# Supplementary material for: Delocalization quantitatively mapped for prototypic organic nitroanions as well as azidoform anions
Source: Royal Society of Chemistry journal article supplement (doi:10.1039/d3ra06708d), 2023-01-01
Supplement: d3ra06708d1.pdf [file d3ra06708d1.pdf]

# Delocalization Quantitatively Mapped For Prototypic Organic

## Nitroanions As Well As Azidoform Anion

Anatoly M. Belostotskii

*Chemistry Department, Bar-Ilan University, Ramat-Gan 5290002, Israel*

### ELECTRONIC SUPPLEMENTARY INFORMATION

#### Content

|     |                                                    |         |
|-----|----------------------------------------------------|---------|
| 1.  | Anion 1, conformer 1A                              | S2-S3   |
| 2.  | Anion 1, conformer 1B                              | S4-S5   |
| 3.  | Anion 1, conformational transition state $TS_{AB}$ | S6-S7   |
| 4.  | Anion 1, conformational transition state $TS_{AA}$ | S8-S9   |
| 5.  | Anion 2                                            | S1-S13  |
| 6.  | Anion 2, conformational transition state $TS_c$    | S14-S15 |
| 7.  | Anion 2, conformational transition state $TS_d$    | S16-S17 |
| 8.  | Anion 3                                            | S18-S19 |
| 9.  | Anion 4                                            | S20-S21 |
| 10. | Anion 5, both conformers                           | S22-S29 |
| 11. | Anion 6, both conformers                           | S30-S32 |
| 12. | Electrocyclic decomposition of anion 2             | S33-S34 |
| 13. | Homolytic decomposition of anion 2                 | S35-S38 |

# 1. Anion 1, conformer 1A

Geometry optimized at the MP2/aug-cc-pVTZ level

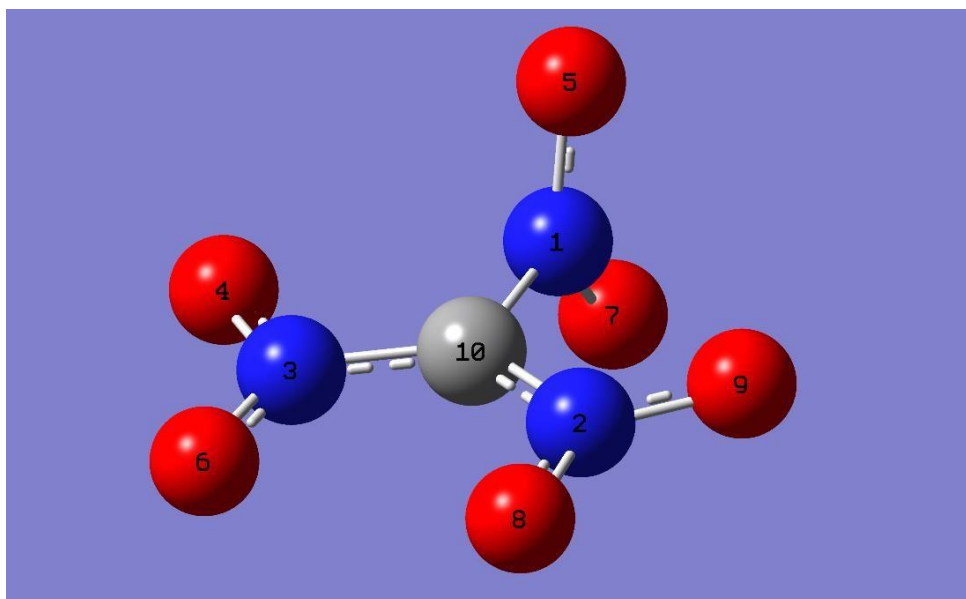

Standard orientation:

| Center Number | Atomic Number | Atomic Type | Coordinates (Angstroms) |           |           |
|---------------|---------------|-------------|-------------------------|-----------|-----------|
|               |               |             | X                       | Y         | Z         |
| 1             | 7             | 0           | 1.347822                | -0.000405 | 0.000084  |
| 2             | 7             | 0           | -0.701597               | 1.240836  | -0.000124 |
| 3             | 7             | 0           | -0.702374               | -1.240422 | -0.000048 |
| 4             | 8             | 0           | 0.082883                | -2.220090 | -0.000326 |
| 5             | 8             | 0           | 1.919098                | -0.000721 | -1.092700 |
| 6             | 8             | 0           | -1.940068               | -1.353206 | 0.000230  |
| 7             | 8             | 0           | 1.918938                | -0.000386 | 1.093035  |
| 8             | 8             | 0           | -1.939223               | 1.354407  | 0.000081  |
| 9             | 8             | 0           | 0.084330                | 2.219971  | -0.000363 |
| 10            | 6             | 0           | -0.102436               | 0.000023  | 0.000162  |

## ENERGY (a.u.):

MP2=-652.5633233

## ESP charges:

|    |   |           |
|----|---|-----------|
| 1  | N | 0.655174  |
| 2  | N | 0.655077  |
| 3  | N | 0.830848  |
| 4  | O | -0.477818 |
| 5  | O | -0.473187 |
| 6  | O | -0.478040 |
| 7  | O | -0.522604 |
| 8  | O | -0.522623 |
| 9  | O | -0.473199 |
| 10 | C | -0.193627 |

Wiberg bond index matrix in the NAO basis:

| Atom | 1      | 2      | 3      | 4      | 5      | 6      | 7      | 8      | 9      |
|------|--------|--------|--------|--------|--------|--------|--------|--------|--------|
| 1. N | 0.0000 | 0.0078 | 0.0054 | 0.0061 | 1.4373 | 0.0061 | 1.3759 | 0.0182 | 0.0144 |
| 2. N | 0.0078 | 0.0000 | 0.0054 | 0.0061 | 0.0144 | 0.0061 | 0.0182 | 1.3758 | 1.4373 |

### S3

|     |   |        |        |        |        |        |        |        |        |        |
|-----|---|--------|--------|--------|--------|--------|--------|--------|--------|--------|
| 3.  | N | 0.0054 | 0.0054 | 0.0000 | 1.5298 | 0.0091 | 1.5299 | 0.0065 | 0.0065 | 0.0091 |
| 4.  | O | 0.0061 | 0.0061 | 1.5298 | 0.0000 | 0.0032 | 0.3369 | 0.0034 | 0.0034 | 0.0032 |
| 5.  | O | 1.4373 | 0.0144 | 0.0091 | 0.0032 | 0.0000 | 0.0032 | 0.2250 | 0.0150 | 0.0171 |
| 6.  | O | 0.0061 | 0.0061 | 1.5299 | 0.3369 | 0.0032 | 0.0000 | 0.0034 | 0.0034 | 0.0032 |
| 7.  | O | 1.3759 | 0.0182 | 0.0065 | 0.0034 | 0.2250 | 0.0034 | 0.0000 | 0.0147 | 0.0150 |
| 8.  | O | 0.0182 | 1.3758 | 0.0065 | 0.0034 | 0.0150 | 0.0034 | 0.0147 | 0.0000 | 0.2250 |
| 9.  | O | 0.0144 | 1.4373 | 0.0091 | 0.0032 | 0.0171 | 0.0032 | 0.0150 | 0.2250 | 0.0000 |
| 10. | C | 1.1511 | 1.1512 | 0.9019 | 0.0497 | 0.1240 | 0.0497 | 0.1131 | 0.1131 | 0.1240 |

| Atom | 10       |
|------|----------|
| 1.   | N 1.1511 |
| 2.   | N 1.1512 |
| 3.   | N 0.9019 |
| 4.   | O 0.0497 |
| 5.   | O 0.1240 |
| 6.   | O 0.0497 |
| 7.   | O 0.1131 |
| 8.   | O 0.1131 |
| 9.   | O 0.1240 |
| 10.  | C 0.0000 |

Highest occupied NLMO

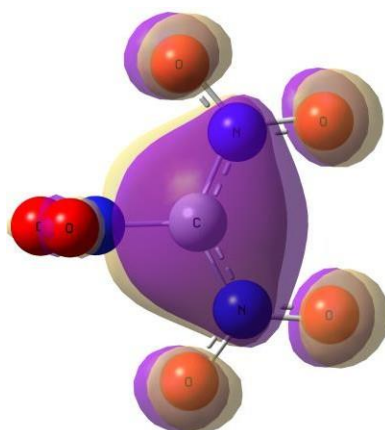

## 2. Anion 1, conformer 1B

Geometry optimized at the MP2/aug-cc-pVTZ level

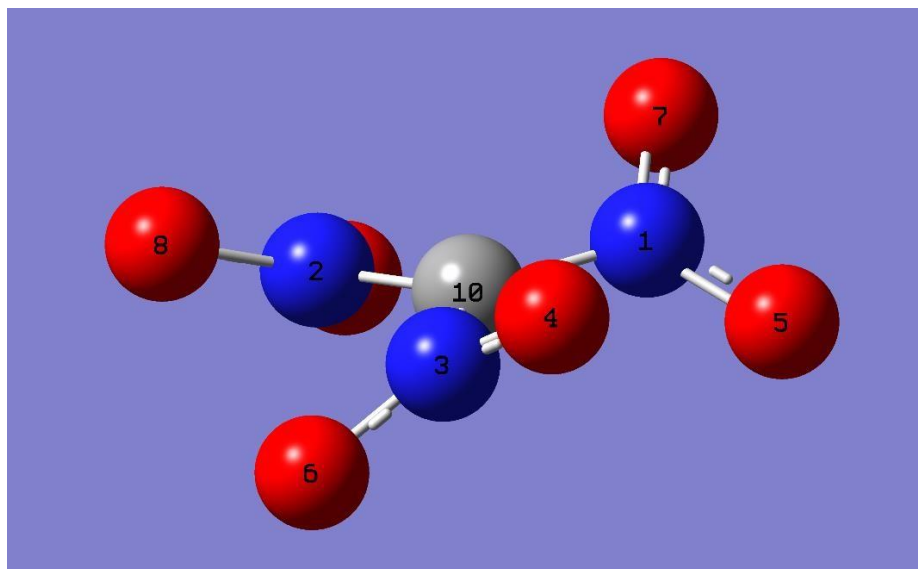

Standard orientation:

| Center Number | Atomic Number | Atomic Type | Coordinates (Angstroms) |           |           |
|---------------|---------------|-------------|-------------------------|-----------|-----------|
|               |               |             | X                       | Y         | Z         |
| 1             | 7             | 0           | 0.098883                | 1.402566  | 0.000004  |
| 2             | 7             | 0           | -1.263974               | -0.615604 | 0.000168  |
| 3             | 7             | 0           | 1.165096                | -0.786890 | -0.000188 |
| 4             | 8             | 0           | 2.193083                | -0.317341 | 0.516251  |
| 5             | 8             | 0           | 1.103199                | 1.922112  | -0.515220 |
| 6             | 8             | 0           | 1.112897                | -1.915745 | -0.516867 |
| 7             | 8             | 0           | -0.822605               | 2.057822  | 0.515310  |
| 8             | 8             | 0           | -1.370770               | -1.740528 | 0.517009  |
| 9             | 8             | 0           | -2.215828               | -0.006509 | -0.516467 |
| 10            | 6             | 0           | 0.000029                | 0.000167  | -0.000002 |

### ENERGY (a.u.):

MP2=-652.5624146

|                                              |                             |
|----------------------------------------------|-----------------------------|
| Zero-point correction=                       | 0.042696 (Hartree/Particle) |
| Thermal correction to Energy=                | 0.051288                    |
| Thermal correction to Enthalpy=              | 0.052232                    |
| Thermal correction to Gibbs Free Energy=     | 0.006971                    |
| Sum of electronic and zero-point Energies=   | -652.519718                 |
| Sum of electronic and thermal Energies=      | -652.511127                 |
| Sum of electronic and thermal Enthalpies=    | -652.510183                 |
| Sum of electronic and thermal Free Energies= | -652.555444                 |

### ESP charges:

|   |   |           |
|---|---|-----------|
| 1 | N | 0.578040  |
| 2 | N | 0.578657  |
| 3 | N | 0.573669  |
| 4 | O | -0.428754 |
| 5 | O | -0.430473 |
| 6 | O | -0.428948 |
| 7 | O | -0.430886 |

## S5

```
8 O -0.430392
9 O -0.430694
10 C -0.150220
```

Wiberg bond index matrix in the NAO basis:

| Atom | 1      | 2      | 3      | 4      | 5      | 6      | 7      |
|------|--------|--------|--------|--------|--------|--------|--------|
| 1. N | 0.0000 | 0.0109 | 1.4330 | 1.4620 | 0.0202 | 0.0071 | 1.1305 |
| 2. N | 0.0109 | 0.0000 | 0.0202 | 0.0071 | 1.4338 | 1.4628 | 1.1287 |
| 3. O | 1.4330 | 0.0202 | 0.0000 | 0.2375 | 0.0097 | 0.0070 | 0.1067 |
| 4. O | 1.4620 | 0.0071 | 0.2375 | 0.0000 | 0.0070 | 0.0066 | 0.1321 |
| 5. O | 0.0202 | 1.4338 | 0.0097 | 0.0070 | 0.0000 | 0.2381 | 0.1063 |
| 6. O | 0.0071 | 1.4628 | 0.0070 | 0.0066 | 0.2381 | 0.0000 | 0.1316 |
| 7. N | 1.1305 | 1.1287 | 0.1067 | 0.1321 | 0.1063 | 0.1316 | 0.0000 |

Highest occupied NLMO

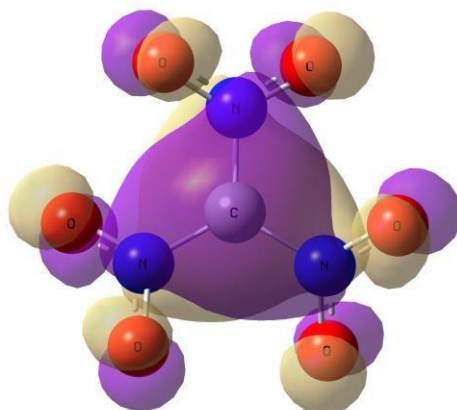

### 3. Anion 1, conformational transition state $TS_{AB}$

(Fig. 2 in the main text)

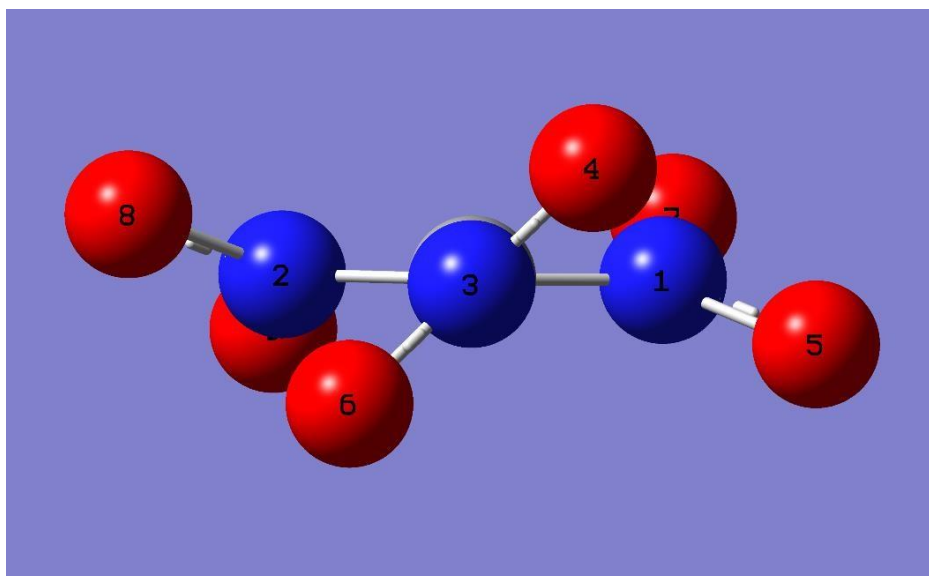

Standard orientation:

| Center Number | Atomic Number | Atomic Type | Coordinates (Angstroms) |           |           |
|---------------|---------------|-------------|-------------------------|-----------|-----------|
|               |               |             | X                       | Y         | Z         |
| 1             | 7             | 0           | -0.706721               | 1.236073  | -0.036400 |
| 2             | 7             | 0           | -0.706971               | -1.235948 | 0.036365  |
| 3             | 7             | 0           | 1.392822                | -0.000106 | 0.000007  |
| 4             | 8             | 0           | 1.979033                | 0.801798  | 0.754380  |
| 5             | 8             | 0           | -0.057710               | 2.226274  | -0.455048 |
| 6             | 8             | 0           | 1.979047                | -0.802129 | -0.754227 |
| 7             | 8             | 0           | -1.896785               | 1.303145  | 0.343326  |
| 8             | 8             | 0           | -0.058136               | -2.226360 | 0.454815  |
| 9             | 8             | 0           | -1.897121               | -1.302728 | -0.343193 |
| 10            | 6             | 0           | -0.040089               | -0.000023 | -0.000040 |

#### ENERGY (a.u.):

MP2=-652.0401204

```

Zero-point correction=                0.042606 (Hartree/Particle)
Thermal correction to Energy=          0.050409
Thermal correction to Enthalpy=        0.051353
Thermal correction to Gibbs Free Energy= 0.008527
Sum of electronic and zero-point Energies= -651.997515
Sum of electronic and thermal Energies= -651.989711
Sum of electronic and thermal Enthalpies= -651.988767
Sum of electronic and thermal Free Energies= -652.031593

```

#### FREQUENCIES

```

Frequencies --   -33.3867                62.0796                72.7949
Frequencies --  132.3482               228.0215               235.0817
Frequencies --  423.7169               425.0005               464.2306
Frequencies --  482.6380               699.1030               721.7875
Frequencies --  723.2050               786.4117               787.0221
Frequencies --  871.1294              1190.3732              1201.5398

```

# S7

|                |           |           |           |
|----------------|-----------|-----------|-----------|
| Frequencies -- | 1346.0654 | 1384.7792 | 1425.3653 |
| Frequencies -- | 1643.3358 | 1674.9206 | 1720.7960 |

#### 4. Anion 1, conformational transition state $TS_{AA}$

(Fig. 2 in the main text)

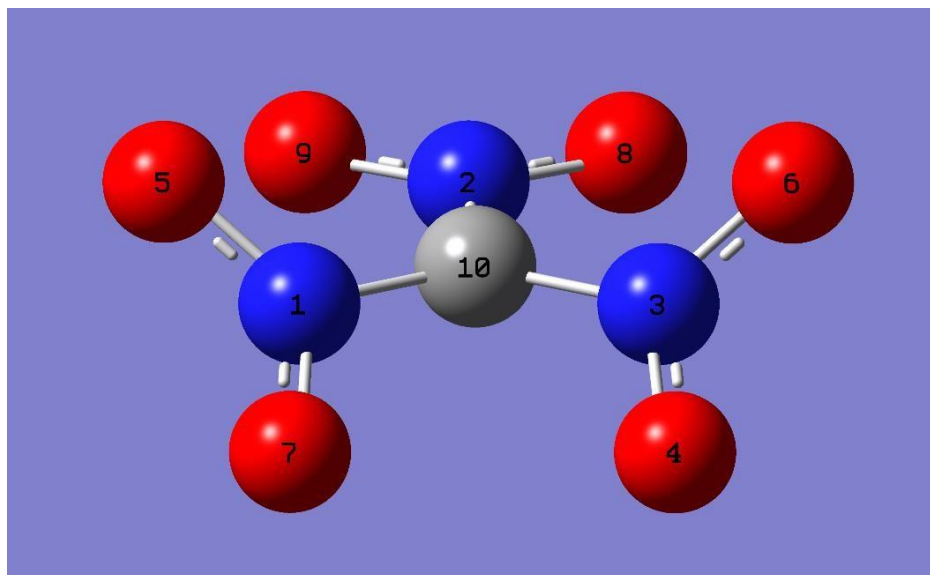

Standard orientation:

| Center Number | Atomic Number | Atomic Type | Coordinates (Angstroms) |           |           |
|---------------|---------------|-------------|-------------------------|-----------|-----------|
|               |               |             | X                       | Y         | Z         |
| 1             | 7             | 0           | -1.228084               | -0.704584 | 0.077023  |
| 2             | 7             | 0           | 0.000455                | 1.419674  | -0.165665 |
| 3             | 7             | 0           | 1.227541                | -0.705222 | 0.077095  |
| 4             | 8             | 0           | 1.318663                | -1.832886 | -0.456087 |
| 5             | 8             | 0           | -2.147853               | -0.185736 | 0.745993  |
| 6             | 8             | 0           | 2.147096                | -0.187210 | 0.746978  |
| 7             | 8             | 0           | -1.319242               | -1.832820 | -0.454996 |
| 8             | 8             | 0           | 1.101024                | 2.009193  | -0.271212 |
| 9             | 8             | 0           | -1.099524               | 2.010262  | -0.271260 |
| 10            | 6             | 0           | -0.000116               | 0.014084  | -0.039081 |

#### ENERGY (a.u.):

MP2=-652.0318078

|                                              |                             |
|----------------------------------------------|-----------------------------|
| Zero-point correction=                       | 0.042379 (Hartree/Particle) |
| Thermal correction to Energy=                | 0.050190                    |
| Thermal correction to Enthalpy=              | 0.051134                    |
| Thermal correction to Gibbs Free Energy=     | 0.008204                    |
| Sum of electronic and zero-point Energies=   | -651.989429                 |
| Sum of electronic and thermal Energies=      | -651.981618                 |
| Sum of electronic and thermal Enthalpies=    | -651.980674                 |
| Sum of electronic and thermal Free Energies= | -652.023604                 |

#### FREQUENCIES

|                |          |          |          |
|----------------|----------|----------|----------|
| Frequencies -- | -81.9723 | 47.3008  | 94.3046  |
| Frequencies -- | 112.8435 | 247.9997 | 256.9534 |



## S9

|                |           |           |           |
|----------------|-----------|-----------|-----------|
| Frequencies -- | 371.0053  | 431.9304  | 447.9455  |
| Frequencies -- | 499.8687  | 709.4900  | 720.4818  |
| Frequencies -- | 736.7080  | 781.5909  | 786.9882  |
| Frequencies -- | 869.7574  | 1183.0439 | 1186.7115 |
| Frequencies -- | 1333.5173 | 1352.2965 | 1413.2038 |
| Frequencies -- | 1635.0506 | 1684.0452 | 1699.2693 |

## 5. Anion 2

Geometry optimized at the MP2/aug-cc-pVTZ level

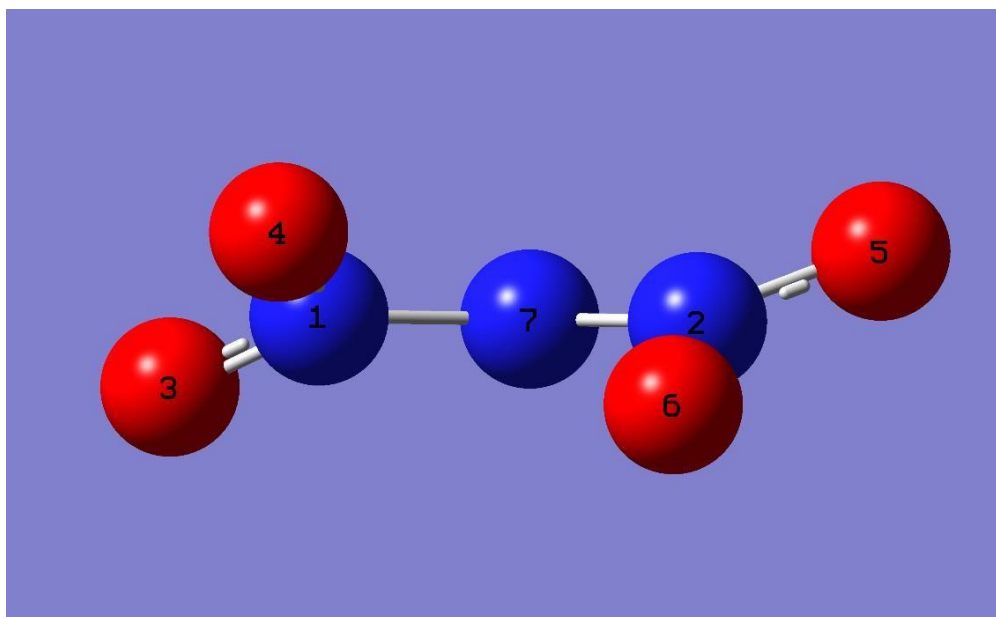

Standard orientation (harmonic approximation)

| Center Number | Atomic Number | Atomic Type | Coordinates (Angstroms) |           |           |
|---------------|---------------|-------------|-------------------------|-----------|-----------|
|               |               |             | X                       | Y         | Z         |
| 1             | 7             | 0           | -1.142414               | -0.060506 | -0.057356 |
| 2             | 7             | 0           | 1.142402                | -0.060513 | 0.057403  |
| 3             | 8             | 0           | -2.161356               | -0.662053 | 0.328647  |
| 4             | 8             | 0           | -1.173983               | 1.071922  | -0.556355 |
| 5             | 8             | 0           | 2.161533                | -0.661869 | -0.328319 |
| 6             | 8             | 0           | 1.173781                | 1.071898  | 0.556409  |
| 7             | 7             | 0           | 0.000040                | -0.816006 | -0.000482 |

Vibration Averaged Geometry

| Center Number | Atomic Number | Coordinates (Angstroms) |           |           |
|---------------|---------------|-------------------------|-----------|-----------|
|               |               | X                       | Y         | Z         |
| 1             | 7             | -1.148489               | -0.059770 | -0.057785 |
| 2             | 7             | 1.148485                | -0.059785 | 0.057836  |
| 3             | 8             | -2.167236               | -0.665340 | 0.326971  |
| 4             | 8             | -1.181966               | 1.075439  | -0.555296 |
| 5             | 8             | 2.167421                | -0.665160 | -0.326642 |
| 6             | 8             | 1.181748                | 1.075409  | 0.555346  |
| 7             | 7             | 0.000043                | -0.817986 | -0.000484 |

**ENERGY (a.u):**

MP2=-464.3503795

```

Zero-point correction=          0.028568 (Hartree/Particle)
Thermal correction to Energy=    0.034215
Thermal correction to Enthalpy=  0.035159
Thermal correction to Gibbs Free Energy= -0.001823
Sum of electronic and zero-point Energies= -464.321812
Sum of electronic and thermal Energies= -464.316164
Sum of electronic and thermal Enthalpies= -464.315220
Sum of electronic and thermal Free Energies= -464.352203

```

### ESP charges:

```

1  N   0.985177
2  N   0.986353
3  O  -0.593078
4  O  -0.553319
5  O  -0.593004
6  O  -0.553253
7  N  -0.678876

```

### FREQUENCIES (harmonic approximation)

```

Frequencies --   93.2264           105.0274           281.7234
Frequencies --  483.6861           503.4058           738.0236
Frequencies --  755.8613           767.0907           839.7728
Frequencies --  980.1390          1078.3638          1248.8441
Frequencies -- 1391.3191          1613.5408          1659.7658

```

### Wiberg bond index matrix in the NAO basis:

| Atom | 1      | 2      | 3      | 4      | 5      | 6      | 7      |
|------|--------|--------|--------|--------|--------|--------|--------|
| 1. N | 0.0000 | 0.0109 | 1.4330 | 1.4620 | 0.0202 | 0.0071 | 1.1305 |
| 2. N | 0.0109 | 0.0000 | 0.0202 | 0.0071 | 1.4338 | 1.4628 | 1.1287 |
| 3. O | 1.4330 | 0.0202 | 0.0000 | 0.2375 | 0.0097 | 0.0070 | 0.1067 |
| 4. O | 1.4620 | 0.0071 | 0.2375 | 0.0000 | 0.0070 | 0.0066 | 0.1321 |
| 5. O | 0.0202 | 1.4338 | 0.0097 | 0.0070 | 0.0000 | 0.2381 | 0.1063 |
| 6. O | 0.0071 | 1.4628 | 0.0070 | 0.0066 | 0.2381 | 0.0000 | 0.1316 |
| 7. N | 1.1305 | 1.1287 | 0.1067 | 0.1321 | 0.1063 | 0.1316 | 0.0000 |

### Highest occupied NLMO

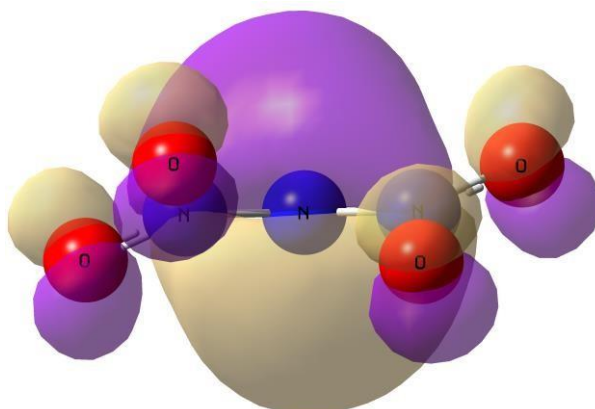

### Internal coordinates for the equilibrium structure

```

Interatomic distances:
      1      2      3      4      5
1  N      0.000000
2  N      2.287696  0.000000

```

## S12

|   |   |          |          |          |          |          |
|---|---|----------|----------|----------|----------|----------|
| 3 | O | 1.244628 | 3.369012 | 0.000000 |          |          |
| 4 | O | 1.237897 | 2.650424 | 2.182843 | 0.000000 |          |
| 5 | O | 3.369143 | 1.244604 | 4.372525 | 3.766125 | 0.000000 |
| 6 | O | 2.650246 | 1.237880 | 3.765847 | 2.598122 | 2.182738 |
| 7 | N | 1.370845 | 1.370807 | 2.191725 | 2.291636 | 2.191640 |
|   |   | 6        | 7        |          |          |          |
| 6 | O | 0.000000 |          |          |          |          |
| 7 | N | 2.291719 | 0.000000 |          |          |          |

## Interatomic angles:

|                   |                   |                   |
|-------------------|-------------------|-------------------|
| N2-N1-O3=143.3294 | N2-N1-O4= 92.619  | O3-N1-O4=123.1118 |
| N2-O4-O3= 87.8241 | N1-N2-O5=143.3468 | O4-N2-O5=148.2459 |
| N1-N2-O6= 92.6099 | O3-N1-O6=148.2302 | N1-O4-O6= 78.7144 |
| N2-O6-O4= 78.7232 | O3-O4-O6=103.5971 | N1-O6-O5= 87.8352 |
| O5-N2-O6=123.1052 | O4-O6-O5=103.611  | N1-N7-N2=113.1115 |
| O3-N1-N7=113.7687 | N2-N7-O3=140.9652 | O4-N1-N7=122.8295 |
| N2-N7-O4= 89.0336 | O4-O3-N7= 63.1819 | N1-N7-O5=140.9834 |
| O5-N2-N7=113.7661 | O3-N7-O5=171.9391 | O4-N7-O5=114.27   |
| N1-N7-O6= 89.0207 | O6-N2-N7=122.8417 | O3-N7-O6=114.2502 |
| O4-N7-O6= 69.0631 | O6-O5-N7= 63.1875 |                   |

## Dihedral angles:

|                     |                     |                    |
|---------------------|---------------------|--------------------|
| O5-N2-N1-O3= 71.94  | O5-N2-N1-O4=-120.35 | O5-N2-O4-O3= 105.9 |
| O6-N2-N1-O3=-120.34 | O6-N2-N1-O4= 47.37  | O6-O4-N1-O3= 150.3 |
| O3-O4-O6-N2= 56.31  | O5-O6-N1-O3= 105.93 | O5-O6-O4-N1= 56.3  |
| O5-N2-O6-O4= 150.36 | O5-O6-O4-O3= 70.38  | O3-N1-N7-N2=-157.4 |
| O4-N1-N7-N2= 28.58  | N7-N1-O4-O3= 173.43 | O4-O3-N7-N2= 37.2  |
| O5-N2-N7-N1=-157.5  | O5-N7-N1-O3=-175.86 | O5-N2-N7-O3=-175.9 |
| O5-N7-N1-O4= 10.16  | O5-N2-N7-O4=-144.96 | O5-N7-O3-O4= 22.1  |
| O6-N2-N7-N1= 28.49  | O6-N7-N1-O3=-144.94 | O6-N2-N7-O3= 10.0  |
| O6-N7-N1-O4= 41.08  | O6-N2-N7-O4= 41.03  | O6-N7-O3-O4= 42.2  |
| O6-O5-N7-N1= 37.19  | N7-N2-O6-O5= 173.46 | O6-O5-N7-O3= 21.6  |
| O6-O5-N7-O4= 42.23  |                     |                    |

## Internal coordinates for the vibration-averaged structure (anharmonic potential energy well)

## Interatomic distances:

|   |   |          |          |          |          |          |
|---|---|----------|----------|----------|----------|----------|
|   |   | 1        | 2        | 3        | 4        | 5        |
| 1 | N | 0.000000 |          |          |          |          |
| 2 | N | 2.299882 | 0.000000 |          |          |          |
| 3 | O | 1.246033 | 3.381292 | 0.000000 |          |          |
| 4 | O | 1.239894 | 2.663769 | 2.186199 | 0.000000 |          |
| 5 | O | 3.381426 | 1.246007 | 4.383658 | 3.781581 | 0.000000 |
| 6 | O | 2.663563 | 1.239875 | 3.781277 | 2.611641 | 2.186100 |
| 7 | N | 1.377425 | 1.377385 | 2.197185 | 2.300004 | 2.197103 |
|   |   | 6        | 7        |          |          |          |
| 6 | O | 0.000000 |          |          |          |          |
| 7 | N | 2.300069 | 0.000000 |          |          |          |

## Interatomic angles:

|                   |                   |                   |
|-------------------|-------------------|-------------------|
| N2-N1-O3=143.2288 | N2-N1-O4= 92.7021 | O3-N1-O4=123.1472 |
| N2-O4-O3= 87.8252 | N1-N2-O5=143.2466 | O4-N2-O5=148.3716 |
| N1-N2-O6= 92.6916 | O3-N1-O6=148.3559 | N1-O4-O6= 78.7503 |
| N2-O6-O4= 78.7604 | O3-O4-O6=103.6661 | N1-O6-O5= 87.8369 |
| O5-N2-O6=123.1416 | O4-O6-O5=103.6809 | N1-N7-N2=113.2026 |
| O3-N1-N7=113.6633 | N2-N7-O3=141.0671 | O4-N1-N7=122.9009 |
| N2-N7-O4= 89.1721 | O4-O3-N7= 63.2968 | N1-N7-O5=141.0851 |
| O5-N2-N7=113.6612 | O3-N7-O5=172.0276 | O4-N7-O5=114.4495 |
| N1-N7-O6= 89.1586 | O6-N2-N7=122.9118 | O3-N7-O6=114.4294 |
| O4-N7-O6= 69.1854 | O6-O5-N7= 63.3017 |                   |

## Dihedral angles:

|                     |                     |                    |
|---------------------|---------------------|--------------------|
| O5-N2-N1-O3= 71.43  | O5-N2-N1-O4=-120.72 | O5-N2-O4-O3= 105.3 |
| O6-N2-N1-O3=-120.71 | O6-N2-N1-O4= 47.14  | O6-O4-N1-O3= 150.5 |
| O3-O4-O6-N2= 55.99  | O5-O6-N1-O3= 105.31 | O5-O6-O4-N1= 55.9  |
| O5-N2-O6-O4= 150.6  | O5-O6-O4-O3= 69.94  | O3-N1-N7-N2=-157.5 |
| O4-N1-N7-N2= 28.45  | N7-N1-O4-O3= 173.44 | O4-O3-N7-N2= 37.1  |
| O5-N2-N7-N1=-157.61 | O5-N7-N1-O3=-175.91 | O5-N2-N7-O3=-176.0 |
| O5-N7-N1-O4= 10.09  | O5-N2-N7-O4=-145.15 | O5-N7-O3-O4= 22.0  |
| O6-N2-N7-N1= 28.36  | O6-N7-N1-O3=-145.13 | O6-N2-N7-O3= 9.9   |

## S13

O6-N7-N1-O4= 40.87      O6-N2-N7-O4= 40.82      O6-N7-O3-O4= 42.0  
O6-O5-N7-N1= 37.06      N7-N2-O6-O5= 173.47      O6-O5-N7-O3= 21.5  
O6-O5-N7-O4= 42.05

**Vibration-averaged geometry (Cartesian coordinates; anharmonic potential energy well)**

| Center<br>Number | Atomic<br>Number | Coordinates (Angstroms) |           |           |
|------------------|------------------|-------------------------|-----------|-----------|
|                  |                  | X                       | Y         | Z         |
| 1                | 7                | -1.148489               | -0.059770 | -0.057785 |
| 2                | 7                | 1.148485                | -0.059785 | 0.057836  |
| 3                | 8                | -2.167236               | -0.665340 | 0.326971  |
| 4                | 8                | -1.181966               | 1.075439  | -0.555296 |
| 5                | 8                | 2.167421                | -0.665160 | -0.326642 |
| 6                | 8                | 1.181748                | 1.075409  | 0.555346  |
| 7                | 7                | 0.000043                | -0.817986 | -0.000484 |

**6. Anion 2, conformational transition state  $TS_c$** 

(Fig. 4 in the main text)

Geometry optimized at the MP2/aug-cc-pVTZ level

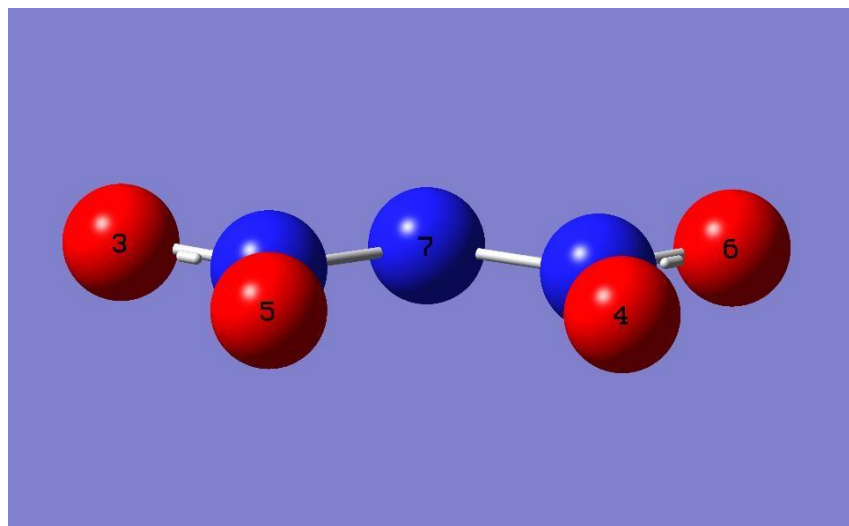

Standard orientation:

| Center Number | Atomic Number | Atomic Type | Coordinates (Angstroms) |           |           |
|---------------|---------------|-------------|-------------------------|-----------|-----------|
|               |               |             | X                       | Y         | Z         |
| 1             | 7             | 0           | 1.171891                | -0.052686 | 0.000198  |
| 2             | 7             | 0           | -1.171920               | -0.052646 | -0.000278 |
| 3             | 8             | 0           | -2.173018               | -0.794895 | 0.001594  |
| 4             | 8             | 0           | 1.256543                | 1.181273  | 0.002437  |
| 5             | 8             | 0           | -1.256362               | 1.181325  | -0.002409 |
| 6             | 8             | 0           | 2.172936                | -0.795002 | -0.001432 |
| 7             | 7             | 0           | -0.000085               | -0.777754 | -0.000137 |

**ENERGY (a.u):**

MP2=-464.3474563

```

Zero-point correction=                0.028247 (Hartree/Particle)
Thermal correction to Energy=         0.033095
Thermal correction to Enthalpy=       0.034039
Thermal correction to Gibbs Free Energy=-0.000992
Sum of electronic and zero-point Energies=-464.319210
Sum of electronic and thermal Energies=-464.314361
Sum of electronic and thermal Enthalpies=-464.313417
Sum of electronic and thermal Free Energies=-464.348448

```

**FREQUENCIES**

```

Frequencies --   -82.1695           146.4261           299.3347
Frequencies --   436.9987           477.7910           760.7999
Frequencies --   769.1215           796.2711           821.7657
Frequencies --   966.7209          1066.2068          1246.6131
Frequencies --  1360.6564          1594.4298          1655.7002

```

**Internal coordinates for the vibration-averaged structure (anharmonic potential energy well)**

Interatomic distances:

|     | 1        | 2        | 3        | 4        | 5        |
|-----|----------|----------|----------|----------|----------|
| 1 N | 0.000000 |          |          |          |          |
| 2 N | 2.354551 | 0.000000 |          |          |          |
| 3 O | 3.438095 | 1.247987 | 0.000000 |          |          |
| 4 O | 1.238501 | 2.733875 | 3.969559 | 0.000000 |          |
| 5 O | 2.733740 | 1.238502 | 2.182002 | 2.522700 | 0.000000 |
| 6 O | 1.247982 | 3.438073 | 4.358775 | 2.181940 | 3.969418 |
| 7 N | 1.384682 | 1.384585 | 2.179396 | 2.334648 | 2.334510 |
|     | 6        | 7        |          |          |          |
| 6 O | 0.000000 |          |          |          |          |
| 7 N | 2.179481 | 0.000000 |          |          |          |

Interatomic angles:

|                   |                   |                   |
|-------------------|-------------------|-------------------|
| N1-N2-O3=143.4169 | N2-N1-O4= 93.896  | O3-N2-O4=170.2863 |
| N1-N2-O5= 93.8887 | N1-O5-O3= 88.0115 | O3-N2-O5=122.6944 |
| N1-O4-O5= 86.1041 | N2-O5-O4= 86.1109 | O3-O5-O4=114.883  |
| N2-N1-O6=143.415  | O4-N1-O6=122.689  | N2-O4-O6= 88.0085 |
| O5-N1-O6=170.2863 | O5-O4-O6=114.8789 | N1-N7-N2=116.4764 |
| N1-N7-O3=148.6318 | O3-N2-N7=111.6539 | O4-N1-N7=125.6565 |
| N2-N7-O4= 90.9432 | O3-N7-O4=123.0986 | N1-N7-O5= 90.9399 |
| O5-N2-N7=125.6517 | O5-O3-N7= 64.7239 | O4-N7-O5= 65.4068 |
| O6-N1-N7=111.6545 | N2-N7-O6=148.6301 | O3-N7-O6=179.2143 |
| O4-O6-N7= 64.7278 | O5-N7-O6=123.0936 |                   |

Dihedral angles:

|                     |                     |                    |
|---------------------|---------------------|--------------------|
| O4-N1-N2-O3=-179.74 | O5-N2-N1-O4= 0.2    | O3-O5-O4-N1= 0.2   |
| O4-O5-N2-O3= 179.86 | O6-N1-N2-O3= 0.3    | O6-N1-O4-N2= 179.9 |
| O6-O4-N2-O3= 0.95   | O6-N1-N2-O5=-179.76 | O6-N1-O5-O3= 0.8   |
| O6-N1-O4-O5= 179.87 | O6-O4-O5-N2= 0.26   | O6-O4-O5-O3= 0.3   |
| O3-N2-N7-N1=-179.89 | O4-N1-N7-N2= 0.12   | O4-N1-N7-O3= 0.0   |
| O4-N7-N2-O3=-179.84 | O5-N2-N7-N1= 0.13   | O5-O3-N7-N1= 0.2   |
| N7-N2-O5-O3= 179.98 | O5-N7-N1-O4= 0.17   | O5-N2-N7-O4= 0.1   |
| O5-O3-N7-O4= 0.2    | O6-N1-N7-N2=-179.91 | O6-N1-N7-O3= 179.9 |
| O6-N7-N2-O3=-179.98 | N7-N1-O6-O4=-179.97 | O4-O6-N7-N2= 0.1   |
| O4-O6-N7-O3=-179.06 | O6-N1-N7-O5=-179.86 | O6-N7-N2-O5= 0.0   |
| O6-N7-O3-O5= 179.25 | O5-N7-O6-O4= 0.19   |                    |

### Vibration-averaged geometry (Cartesian coordinates; anharmonic potential energy well)

| Center Number | Atomic Number | Coordinates (Angstroms) |           |           |
|---------------|---------------|-------------------------|-----------|-----------|
|               |               | X                       | Y         | Z         |
| 1             | 7             | -1.177263               | -0.052238 | -0.000203 |
| 2             | 7             | 1.177289                | -0.052196 | 0.000283  |
| 3             | 8             | 2.179427                | -0.795962 | -0.001602 |
| 4             | 8             | -1.261436               | 1.183397  | -0.002448 |
| 5             | 8             | 1.261260                | 1.183454  | 0.002420  |
| 6             | 8             | -2.179347               | -0.796069 | 0.001438  |
| 7             | 7             | 0.000083                | -0.781073 | 0.000139  |

7. Anion 2, conformational transition state  $TS_d$ 

(Fig. 4 in the main text)

Geometry optimized at the MP2/aug-cc-pVTZ level

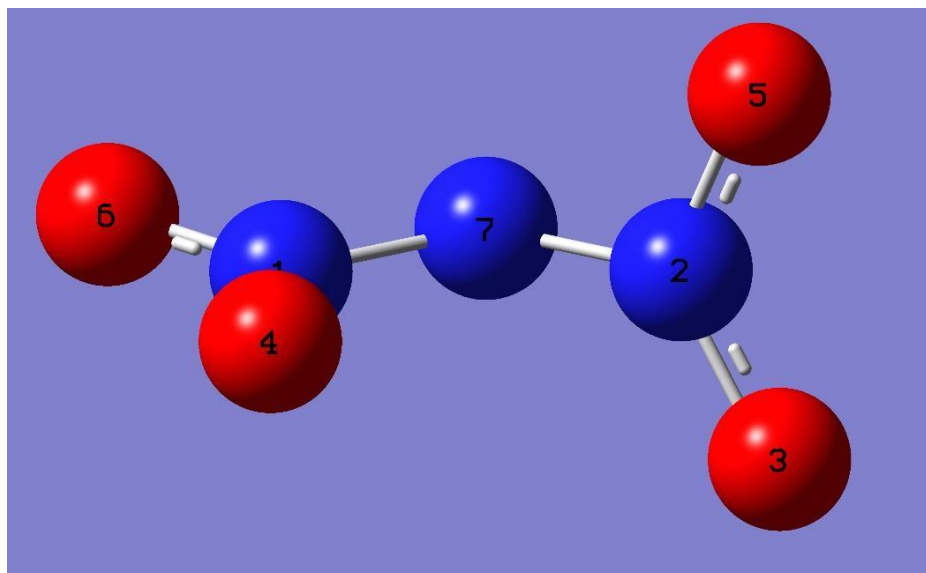

Standard orientation:

| Center Number | Atomic Number | Atomic Type | Coordinates (Angstroms) |           |           |
|---------------|---------------|-------------|-------------------------|-----------|-----------|
|               |               |             | X                       | Y         | Z         |
| 1             | 7             | 0           | 1.162034                | 0.055419  | -0.024537 |
| 2             | 7             | 0           | -1.149267               | -0.123159 | -0.104986 |
| 3             | 8             | 0           | -1.761610               | 0.739170  | -0.748317 |
| 4             | 8             | 0           | 1.058358                | 1.046616  | 0.709797  |
| 5             | 8             | 0           | -1.628231               | -0.696609 | 0.890357  |
| 6             | 8             | 0           | 2.253149                | -0.478350 | -0.295794 |
| 7             | 7             | 0           | 0.076711                | -0.629973 | -0.505614 |

**ENERGY (a.u.):**

MP2=-464.3407641

```

Zero-point correction=                0.028012 (Hartree/Particle)
Thermal correction to Energy=         0.033008
Thermal correction to Enthalpy=       0.033953
Thermal correction to Gibbs Free Energy=-0.001526
Sum of electronic and zero-point Energies= -464.312752
Sum of electronic and thermal Energies= -464.307756
Sum of electronic and thermal Enthalpies= -464.306811
Sum of electronic and thermal Free Energies= -464.342290

```

**FREQUENCIES**

```

Frequencies -- -110.4307          123.8860          193.5452
Frequencies --  470.1739          599.1815          637.1434

```



|                |           |           |           |
|----------------|-----------|-----------|-----------|
| Frequencies -- | 741.5330  | 754.8300  | 845.3163  |
| Frequencies -- | 957.1520  | 1070.1211 | 1241.7850 |
| Frequencies -- | 1386.0283 | 1616.2160 | 1658.9313 |

### Internal coordinates for the vibration-averaged structure (anharmonic potential energy well)

Interatomic distances:

|     |          |          |          |          |          |
|-----|----------|----------|----------|----------|----------|
|     | 1        | 2        | 3        | 4        | 5        |
| 1 N | 0.000000 |          |          |          |          |
| 2 N | 2.239133 | 0.000000 |          |          |          |
| 3 O | 2.963090 | 1.229214 | 0.000000 |          |          |
| 4 O | 1.257269 | 2.462302 | 3.005311 | 0.000000 |          |
| 5 O | 2.965313 | 1.229247 | 2.176225 | 3.009467 | 0.000000 |
| 6 O | 1.253801 | 3.402623 | 4.096085 | 2.203184 | 4.097690 |
| 7 N | 1.334076 | 1.426851 | 2.273583 | 2.264574 | 2.273253 |
|     | 6        | 7        |          |          |          |
| 6 O | 0.000000 |          |          |          |          |
| 7 N | 2.189547 | 0.000000 |          |          |          |

Interatomic angles:

|                   |                   |                   |
|-------------------|-------------------|-------------------|
| N1-N2-O3=114.1851 | N2-N1-O4= 84.5832 | O3-N1-O4= 79.7272 |
| O3-N2-O4=103.9371 | N1-N2-O5=114.3339 | N1-O3-O5= 68.5185 |
| O3-N2-O5=124.5518 | O4-N1-O5= 79.8273 | O4-N2-O5=104.1798 |
| O4-O3-O5= 68.8905 | N2-N1-O6=152.7591 | O3-N1-O6=149.8647 |
| O4-N1-O6=122.6577 | N2-O4-O6= 93.4922 | O3-O4-O6=102.6144 |
| O5-N1-O6=149.7904 | O5-O4-O6=102.5442 | N1-N7-N2=108.3423 |
| N1-N7-O3=107.5674 | O3-N2-N7=117.5476 | O4-N1-N7=121.8018 |
| N2-N7-O4= 80.1883 | O3-N7-O4= 82.9403 | N1-N7-O5=107.7155 |
| O5-N2-N7=117.5176 | O3-O5-N7= 61.412  | O4-N7-O5= 83.0879 |
| O6-N1-N7=115.5405 | N2-N7-O6=139.4517 | O3-N7-O6=133.193  |
| O4-O6-N7= 62.0645 | O5-N7-O6=133.3166 |                   |

Dihedral angles:

|                     |                     |                    |
|---------------------|---------------------|--------------------|
| O4-N1-N2-O3= 76.03  | O5-N2-O3-N1= 149.06 | O5-N2-N1-O4= -76.2 |
| O5-O3-N1-O4= -86.05 | O5-N2-O4-O3=-131.71 | O6-N1-N2-O3=-103.9 |
| O6-N1-O4-N2=-179.99 | O6-N1-O4-O3= 158.1  | O6-O4-N2-O3=-114.2 |
| O6-N1-N2-O5= 103.71 | O6-N1-O3-O5= 132.68 | O6-N1-O5-O4= 141.3 |
| O6-O4-N2-O5= 114.08 | O6-O4-O3-O5= 94.88  | O3-N2-N7-N1= 93.2  |
| O4-N1-N7-N2= 0.01   | O4-N1-N7-O3= 30.14  | O4-N7-N2-O3= 93.2  |
| O5-N2-N7-N1= -93.54 | O3-O5-N7-N1= 99.85  | N7-N2-O5-O3=-172.7 |
| O5-N7-N1-O4= -30.16 | O5-N2-N7-O4= -93.54 | O4-N7-O5-O3= 86.0  |
| O6-N1-N7-N2= 179.99 | O6-N1-N7-O3=-149.87 | O6-N7-N2-O3= 93.2  |
| N7-N1-O6-O4=-179.99 | O4-O6-N7-N2= 0.     | O4-O6-N7-O3= 41.0  |
| O6-N1-N7-O5= 149.83 | O6-N7-N2-O5= -93.54 | O6-N7-O5-O3= 120.7 |
| O5-N7-O6-O4= -41.14 |                     |                    |

### Vibration-averaged geometry (Cartesian coordinates; anharmonic potential energy well)

| Center Number | Atomic Number | Coordinates (Angstroms) |           |           |
|---------------|---------------|-------------------------|-----------|-----------|
|               |               | X                       | Y         | Z         |
| 1             | 7             | 1.116557                | 0.021365  | 0.001386  |
| 2             | 7             | -1.113943               | -0.174737 | -0.009939 |
| 3             | 8             | -1.639120               | 0.110630  | -1.084053 |
| 4             | 8             | 0.888526                | 1.255891  | 0.069756  |
| 5             | 8             | -1.642039               | -0.015020 | 1.088540  |
| 6             | 8             | 2.277347                | -0.451834 | -0.024416 |
| 7             | 7             | 0.129071                | -0.874267 | -0.048361 |

## 8. Anion 3

Geometry optimized at the MP3/aug-cc-pVTZ level

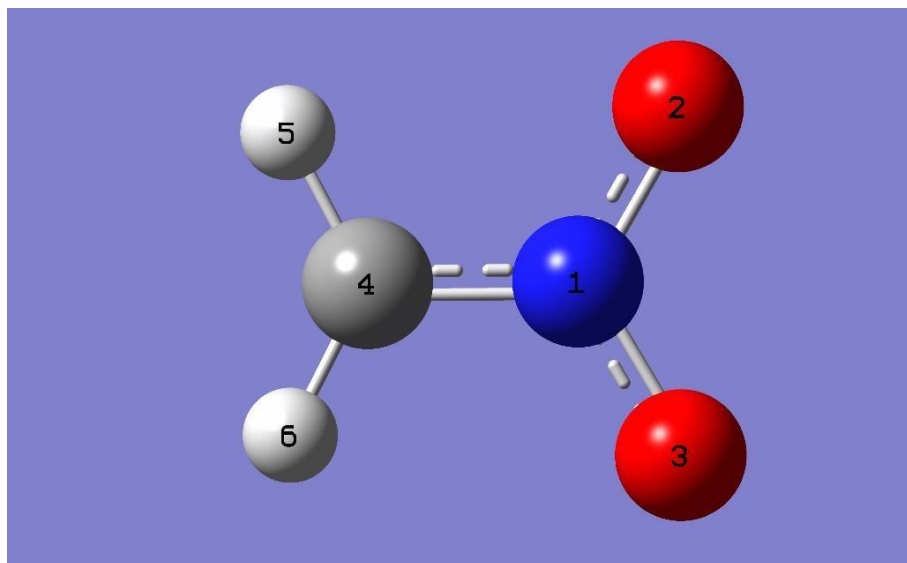

Standard orientation:

| Center Number | Atomic Number | Atomic Type | Coordinates (Angstroms) |           |           |
|---------------|---------------|-------------|-------------------------|-----------|-----------|
|               |               |             | X                       | Y         | Z         |
| 1             | 7             | 0           | 0.044276                | 0.000245  | 0.000079  |
| 2             | 8             | 0           | 0.683595                | 1.098259  | 0.000000  |
| 3             | 8             | 0           | 0.684353                | -1.097957 | 0.000001  |
| 4             | 6             | 0           | -1.283023               | -0.000444 | -0.000349 |
| 5             | 1             | 0           | -1.778271               | 0.952041  | 0.000771  |
| 6             | 1             | 0           | -1.777104               | -0.953512 | 0.000759  |

### ENERGY (a.u.):

MP2=-244.0627292

MP3=-244.0491347

### ESP charges:

|   |   |           |
|---|---|-----------|
| 1 | N | 0.892910  |
| 2 | O | -0.732160 |
| 3 | O | -0.731750 |
| 4 | C | -0.736867 |
| 5 | H | 0.153798  |
| 6 | H | 0.154069  |

Wiberg bond index matrix in the NAO basis:

| Atom | 1      | 2      | 3      | 4      | 5      | 6      |
|------|--------|--------|--------|--------|--------|--------|
| 1. N | 0.0000 | 1.1757 | 1.1764 | 1.3037 | 0.0048 | 0.0048 |
| 2. O | 1.1757 | 0.0000 | 0.1486 | 0.1876 | 0.0158 | 0.0038 |
| 3. O | 1.1764 | 0.1486 | 0.0000 | 0.1879 | 0.0038 | 0.0157 |
| 4. C | 1.3037 | 0.1876 | 0.1879 | 0.0000 | 0.9115 | 0.9115 |
| 5. H | 0.0048 | 0.0158 | 0.0038 | 0.9115 | 0.0000 | 0.0008 |
| 6. H | 0.0048 | 0.0038 | 0.0157 | 0.9115 | 0.0008 | 0.0000 |

Two highest occupied NLMOs

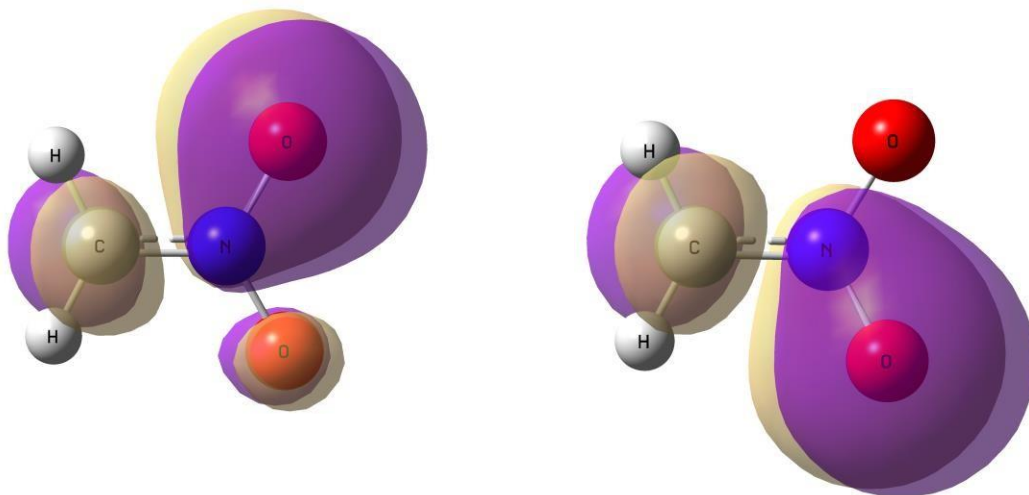

## 9. Anion 4

Geometry optimized at the MP3/aug-cc-pVTZ level

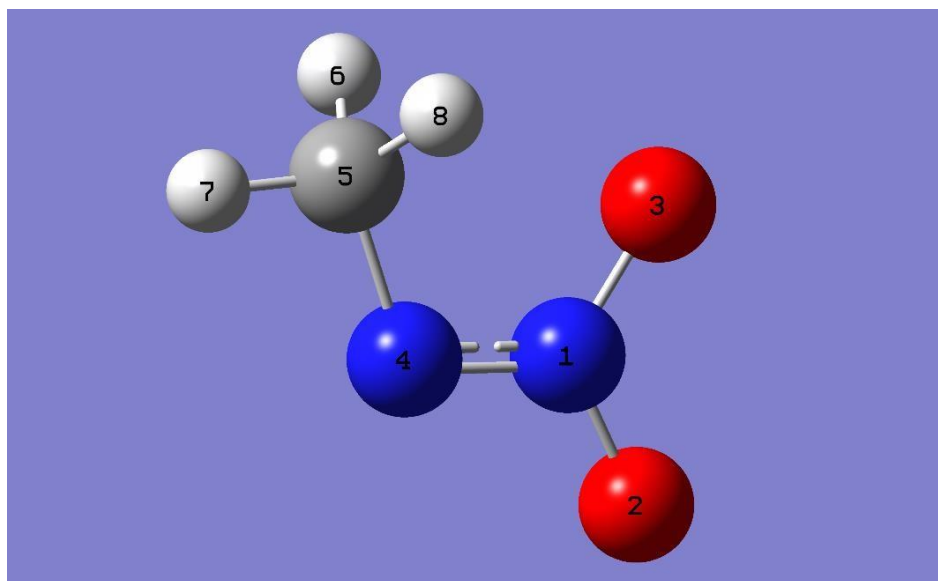

Standard orientation:

| Center Number | Atomic Number | Atomic Type | Coordinates (Angstroms) |           |           |
|---------------|---------------|-------------|-------------------------|-----------|-----------|
|               |               |             | X                       | Y         | Z         |
| 1             | 7             | 0           | 0.523783                | -0.018490 | -0.000752 |
| 2             | 8             | 0           | 1.670180                | -0.525086 | 0.000555  |
| 3             | 8             | 0           | 0.390610                | 1.237348  | 0.000010  |
| 4             | 7             | 0           | -0.497946               | -0.803867 | -0.000389 |
| 5             | 6             | 0           | -1.739193               | -0.056401 | 0.000312  |
| 6             | 1             | 0           | -1.840513               | 0.594288  | -0.875156 |
| 7             | 1             | 0           | -2.549317               | -0.787143 | -0.002294 |
| 8             | 1             | 0           | -1.842195               | 0.589662  | 0.879046  |

### ENERGY (a.u.):

MP2=-299.3322808

MP3=-299.318175

### ESP charges:

|   |   |           |
|---|---|-----------|
| 1 | N | 1.110367  |
| 2 | O | -0.764995 |
| 3 | O | -0.714478 |
| 4 | N | -0.805446 |
| 5 | C | 0.497264  |
| 6 | H | -0.106562 |
| 7 | H | -0.110179 |
| 8 | H | -0.105970 |

Wiberg bond index matrix in the NAO basis:

| Atom | 1      | 2      | 3      | 4      | 5      | 6      | 7      | 8      |
|------|--------|--------|--------|--------|--------|--------|--------|--------|
| 1. N | 0.0000 | 1.2234 | 1.1950 | 1.3051 | 0.0104 | 0.0075 | 0.0065 | 0.0075 |
| 2. O | 1.2234 | 0.0000 | 0.1567 | 0.1756 | 0.0217 | 0.0052 | 0.0010 | 0.0052 |
| 3. O | 1.1950 | 0.1567 | 0.0000 | 0.1927 | 0.0108 | 0.0086 | 0.0062 | 0.0086 |

## S21

|    |   |        |        |        |        |        |        |        |        |
|----|---|--------|--------|--------|--------|--------|--------|--------|--------|
| 4. | N | 1.3051 | 0.1756 | 0.1927 | 0.0000 | 0.9622 | 0.0141 | 0.0084 | 0.0141 |
| 5. | C | 0.0104 | 0.0217 | 0.0108 | 0.9622 | 0.0000 | 0.8865 | 0.9034 | 0.8865 |
| 6. | H | 0.0075 | 0.0052 | 0.0086 | 0.0141 | 0.8865 | 0.0000 | 0.0003 | 0.0007 |
| 7. | H | 0.0065 | 0.0010 | 0.0062 | 0.0084 | 0.9034 | 0.0003 | 0.0000 | 0.0003 |
| 8. | H | 0.0075 | 0.0052 | 0.0086 | 0.0141 | 0.8865 | 0.0007 | 0.0003 | 0.0000 |

Highest occupied NLMO

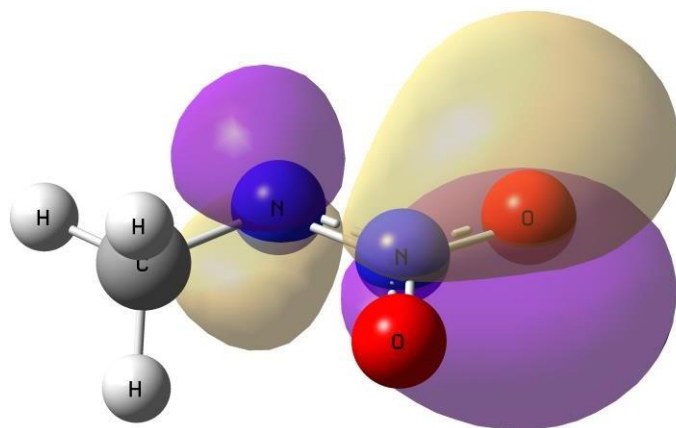

## 10. Anion 5 (conformers 5A and 5B)

Geometry optimized at the MP2/aug-cc-pVTZ level

### Conformer 5A

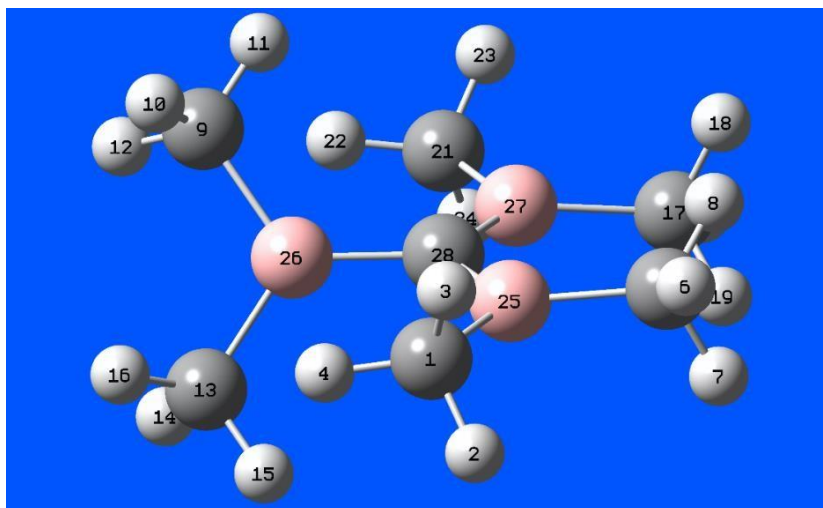

Standard orientation:

| Center Number | Atomic Number | Coordinates (Angstroms) |           |           |
|---------------|---------------|-------------------------|-----------|-----------|
|               |               | X                       | Y         | Z         |
| 1             | 6             | 0.009193                | -2.762762 | -0.134521 |
| 2             | 1             | -0.422754               | -3.445693 | 0.608072  |
| 3             | 1             | -0.182898               | -3.235119 | -1.106190 |
| 4             | 1             | 1.088211                | -2.738085 | 0.014499  |
| 5             | 6             | -2.343376               | -1.544665 | -0.295141 |
| 6             | 1             | -2.570564               | -2.506953 | -0.766652 |
| 7             | 1             | -2.839091               | -1.554497 | 0.683499  |
| 8             | 1             | -2.822637               | -0.757159 | -0.875894 |
| 9             | 6             | 2.360601                | 0.787011  | -1.080626 |
| 10            | 1             | 2.804966                | 0.020218  | -1.729392 |
| 11            | 1             | 1.782457                | 1.458104  | -1.714936 |
| 12            | 1             | 3.202832                | 1.335658  | -0.643614 |
| 13            | 6             | 2.359348                | -0.790660 | 1.080642  |
| 14            | 1             | 2.804890                | -0.024572 | 1.729429  |
| 15            | 1             | 1.780149                | -1.460861 | 1.714930  |
| 16            | 1             | 3.200733                | -1.340612 | 0.643641  |
| 17            | 6             | -2.340997               | 1.548242  | 0.295236  |
| 18            | 1             | -2.836781               | 1.558739  | -0.683366 |
| 19            | 1             | -2.821391               | 0.761510  | 0.876103  |
| 20            | 1             | -2.566692               | 2.510915  | 0.766684  |
| 21            | 6             | 0.013389                | 2.762776  | 0.134415  |
| 22            | 1             | 1.092355                | 2.736477  | -0.014687 |
| 23            | 1             | -0.417593               | 3.446333  | -0.608163 |
| 24            | 1             | -0.177919               | 3.235447  | 1.106085  |
| 25            | 5             | -0.753751               | -1.339421 | -0.095422 |
| 26            | 5             | 1.477210                | -0.001124 | 0.000007  |
| 27            | 5             | -0.751702               | 1.340587  | 0.095411  |
| 28            | 6             | -0.050999               | 0.000048  | -0.000009 |

ENERGY (a.u.):

MP2=-351.3684623

## ESP atomic charges

|    |   |           |
|----|---|-----------|
| 1  | C | -0.394853 |
| 2  | H | 0.024454  |
| 3  | H | 0.007295  |
| 4  | H | 0.034351  |
| 5  | C | -0.363742 |
| 6  | H | 0.005461  |
| 7  | H | 0.021612  |
| 8  | H | 0.029495  |
| 9  | C | -0.519737 |
| 10 | H | 0.026276  |
| 11 | H | 0.054614  |
| 12 | H | 0.060481  |
| 13 | C | -0.520417 |
| 14 | H | 0.026384  |
| 15 | H | 0.054962  |
| 16 | H | 0.060538  |
| 17 | C | -0.365706 |
| 18 | H | 0.022155  |
| 19 | H | 0.030078  |
| 20 | H | 0.005760  |
| 21 | C | -0.403999 |
| 22 | H | 0.036663  |
| 23 | H | 0.026721  |
| 24 | H | 0.009530  |
| 25 | B | 0.702272  |
| 26 | B | 0.981649  |
| 27 | B | 0.705916  |
| 28 | C | -1.358210 |

Wiberg bond index matrix in the NAO basis:

| Atom | 1  | 2      | 3      | 4      | 5      | 6      | 7      | 8      | 9      |        |
|------|----|--------|--------|--------|--------|--------|--------|--------|--------|--------|
| 1.   | C  | 0.0000 | 0.8874 | 0.8840 | 0.8923 | 0.0065 | 0.0032 | 0.0014 | 0.0070 | 0.0007 |
| 2.   | H  | 0.8874 | 0.0000 | 0.0008 | 0.0008 | 0.0011 | 0.0001 | 0.0002 | 0.0003 | 0.0001 |
| 3.   | H  | 0.8840 | 0.0008 | 0.0000 | 0.0008 | 0.0011 | 0.0002 | 0.0004 | 0.0001 | 0.0005 |
| 4.   | H  | 0.8923 | 0.0008 | 0.0008 | 0.0000 | 0.0095 | 0.0004 | 0.0002 | 0.0005 | 0.0002 |
| 5.   | C  | 0.0065 | 0.0011 | 0.0011 | 0.0095 | 0.0000 | 0.8954 | 0.8816 | 0.8887 | 0.0003 |
| 6.   | H  | 0.0032 | 0.0001 | 0.0002 | 0.0004 | 0.8954 | 0.0000 | 0.0007 | 0.0006 | 0.0003 |
| 7.   | H  | 0.0014 | 0.0002 | 0.0004 | 0.0002 | 0.8816 | 0.0007 | 0.0000 | 0.0010 | 0.0001 |
| 8.   | H  | 0.0070 | 0.0003 | 0.0001 | 0.0005 | 0.8887 | 0.0006 | 0.0010 | 0.0000 | 0.0000 |
| 9.   | C  | 0.0007 | 0.0001 | 0.0005 | 0.0002 | 0.0003 | 0.0003 | 0.0001 | 0.0000 | 0.0000 |
| 10.  | H  | 0.0001 | 0.0000 | 0.0000 | 0.0000 | 0.0002 | 0.0000 | 0.0000 | 0.0000 | 0.8734 |
| 11.  | H  | 0.0001 | 0.0000 | 0.0000 | 0.0001 | 0.0001 | 0.0000 | 0.0000 | 0.0000 | 0.8877 |
| 12.  | H  | 0.0001 | 0.0001 | 0.0000 | 0.0000 | 0.0001 | 0.0000 | 0.0001 | 0.0000 | 0.8865 |
| 13.  | C  | 0.0010 | 0.0003 | 0.0003 | 0.0019 | 0.0004 | 0.0001 | 0.0002 | 0.0001 | 0.0076 |
| 14.  | H  | 0.0012 | 0.0000 | 0.0001 | 0.0006 | 0.0001 | 0.0000 | 0.0000 | 0.0000 | 0.0011 |
| 15.  | H  | 0.0006 | 0.0000 | 0.0002 | 0.0001 | 0.0001 | 0.0000 | 0.0000 | 0.0000 | 0.0100 |
| 16.  | H  | 0.0003 | 0.0000 | 0.0000 | 0.0002 | 0.0003 | 0.0000 | 0.0001 | 0.0000 | 0.0010 |
| 17.  | C  | 0.0004 | 0.0000 | 0.0001 | 0.0001 | 0.0020 | 0.0006 | 0.0003 | 0.0017 | 0.0004 |
| 18.  | H  | 0.0001 | 0.0001 | 0.0001 | 0.0000 | 0.0003 | 0.0000 | 0.0002 | 0.0006 | 0.0002 |
| 19.  | H  | 0.0001 | 0.0000 | 0.0000 | 0.0000 | 0.0017 | 0.0003 | 0.0006 | 0.0002 | 0.0001 |
| 20.  | H  | 0.0002 | 0.0000 | 0.0000 | 0.0000 | 0.0006 | 0.0001 | 0.0000 | 0.0003 | 0.0001 |
| 21.  | H  | 0.0002 | 0.0000 | 0.0000 | 0.0000 | 0.0006 | 0.0001 | 0.0000 | 0.0003 | 0.0001 |
| 22.  | C  | 0.0004 | 0.0002 | 0.0002 | 0.0001 | 0.0004 | 0.0002 | 0.0001 | 0.0001 | 0.0010 |
| 23.  | H  | 0.0001 | 0.0000 | 0.0000 | 0.0000 | 0.0001 | 0.0000 | 0.0000 | 0.0000 | 0.0019 |
| 24.  | H  | 0.0002 | 0.0002 | 0.0000 | 0.0000 | 0.0000 | 0.0000 | 0.0001 | 0.0000 | 0.0003 |
| 25.  | H  | 0.0002 | 0.0000 | 0.0001 | 0.0000 | 0.0001 | 0.0000 | 0.0001 | 0.0000 | 0.0003 |
| 26.  | B  | 0.8172 | 0.0076 | 0.0092 | 0.0046 | 0.8187 | 0.0047 | 0.0107 | 0.0061 | 0.0105 |
| 27.  | B  | 0.0059 | 0.0010 | 0.0007 | 0.0022 | 0.0089 | 0.0003 | 0.0016 | 0.0006 | 0.8054 |
| 28.  | B  | 0.0087 | 0.0025 | 0.0028 | 0.0003 | 0.0022 | 0.0009 | 0.0026 | 0.0006 | 0.0053 |
|      | C  | 0.0051 | 0.0104 | 0.0103 | 0.0016 | 0.0055 | 0.0098 | 0.0072 | 0.0025 | 0.0081 |
| Atom | 10 | 11     | 12     | 13     | 14     | 15     | 16     | 17     | 18     |        |

## S24

|     |   |        |        |        |        |        |        |        |        |        |
|-----|---|--------|--------|--------|--------|--------|--------|--------|--------|--------|
| 1.  | C | 0.0001 | 0.0001 | 0.0001 | 0.0010 | 0.0012 | 0.0006 | 0.0003 | 0.0004 | 0.0001 |
| 2.  | H | 0.0000 | 0.0000 | 0.0001 | 0.0003 | 0.0000 | 0.0000 | 0.0000 | 0.0000 | 0.0001 |
| 3.  | H | 0.0000 | 0.0000 | 0.0000 | 0.0003 | 0.0001 | 0.0002 | 0.0000 | 0.0001 | 0.0001 |
| 4.  | H | 0.0000 | 0.0001 | 0.0000 | 0.0019 | 0.0006 | 0.0001 | 0.0002 | 0.0001 | 0.0000 |
| 5.  | C | 0.0002 | 0.0001 | 0.0001 | 0.0004 | 0.0001 | 0.0001 | 0.0003 | 0.0020 | 0.0003 |
| 6.  | H | 0.0000 | 0.0000 | 0.0000 | 0.0001 | 0.0000 | 0.0000 | 0.0000 | 0.0006 | 0.0000 |
| 7.  | H | 0.0000 | 0.0000 | 0.0001 | 0.0002 | 0.0000 | 0.0000 | 0.0001 | 0.0003 | 0.0002 |
| 8.  | H | 0.0000 | 0.0000 | 0.0000 | 0.0001 | 0.0000 | 0.0000 | 0.0000 | 0.0017 | 0.0006 |
| 9.  | C | 0.8734 | 0.8877 | 0.8865 | 0.0076 | 0.0011 | 0.0100 | 0.0010 | 0.0004 | 0.0002 |
| 10. | H | 0.0000 | 0.0008 | 0.0011 | 0.0011 | 0.0006 | 0.0001 | 0.0002 | 0.0001 | 0.0000 |
| 11. | H | 0.0008 | 0.0000 | 0.0007 | 0.0100 | 0.0001 | 0.0006 | 0.0002 | 0.0001 | 0.0000 |
| 12. | H | 0.0011 | 0.0007 | 0.0000 | 0.0010 | 0.0002 | 0.0002 | 0.0002 | 0.0003 | 0.0001 |
| 13. | C | 0.0011 | 0.0100 | 0.0010 | 0.0000 | 0.8734 | 0.8877 | 0.8865 | 0.0003 | 0.0001 |
| 14. | H | 0.0006 | 0.0001 | 0.0002 | 0.8734 | 0.0000 | 0.0008 | 0.0011 | 0.0002 | 0.0000 |
| 15. | H | 0.0001 | 0.0006 | 0.0002 | 0.8877 | 0.0008 | 0.0000 | 0.0007 | 0.0001 | 0.0000 |
| 16. | H | 0.0002 | 0.0002 | 0.0002 | 0.8865 | 0.0011 | 0.0007 | 0.0000 | 0.0001 | 0.0001 |
| 17. | C | 0.0001 | 0.0001 | 0.0003 | 0.0003 | 0.0002 | 0.0001 | 0.0001 | 0.0000 | 0.8816 |
| 18. | H | 0.0000 | 0.0000 | 0.0001 | 0.0001 | 0.0000 | 0.0000 | 0.0001 | 0.8816 | 0.0000 |
| 19. | H | 0.0000 | 0.0000 | 0.0000 | 0.0000 | 0.0000 | 0.0000 | 0.0000 | 0.8887 | 0.0010 |
| 20. | H | 0.0000 | 0.0000 | 0.0000 | 0.0003 | 0.0000 | 0.0000 | 0.0000 | 0.8954 | 0.0007 |
| 21. | C | 0.0012 | 0.0006 | 0.0003 | 0.0007 | 0.0001 | 0.0001 | 0.0001 | 0.0065 | 0.0014 |
| 22. | H | 0.0006 | 0.0001 | 0.0002 | 0.0002 | 0.0000 | 0.0001 | 0.0000 | 0.0095 | 0.0002 |
| 23. | H | 0.0000 | 0.0000 | 0.0000 | 0.0001 | 0.0000 | 0.0000 | 0.0001 | 0.0011 | 0.0002 |
| 24. | H | 0.0001 | 0.0002 | 0.0000 | 0.0005 | 0.0000 | 0.0000 | 0.0000 | 0.0011 | 0.0004 |
| 25. | B | 0.0006 | 0.0004 | 0.0020 | 0.0053 | 0.0013 | 0.0007 | 0.0013 | 0.0022 | 0.0026 |
| 26. | B | 0.0179 | 0.0059 | 0.0096 | 0.8054 | 0.0178 | 0.0059 | 0.0096 | 0.0089 | 0.0016 |
| 27. | B | 0.0013 | 0.0007 | 0.0013 | 0.0105 | 0.0006 | 0.0004 | 0.0020 | 0.8187 | 0.0107 |
| 28. | C | 0.0054 | 0.0024 | 0.0099 | 0.0081 | 0.0054 | 0.0024 | 0.0099 | 0.0055 | 0.0072 |

| Atom | 19 | 20     | 21     | 22     | 23     | 24     | 25     | 26     | 27     |        |
|------|----|--------|--------|--------|--------|--------|--------|--------|--------|--------|
| 1.   | C  | 0.0001 | 0.0002 | 0.0004 | 0.0001 | 0.0002 | 0.0002 | 0.8172 | 0.0059 | 0.0087 |
| 2.   | H  | 0.0000 | 0.0000 | 0.0002 | 0.0000 | 0.0002 | 0.0000 | 0.0076 | 0.0010 | 0.0025 |
| 3.   | H  | 0.0000 | 0.0000 | 0.0002 | 0.0000 | 0.0000 | 0.0001 | 0.0092 | 0.0007 | 0.0028 |
| 4.   | H  | 0.0000 | 0.0000 | 0.0001 | 0.0000 | 0.0000 | 0.0000 | 0.0046 | 0.0022 | 0.0003 |
| 5.   | C  | 0.0017 | 0.0006 | 0.0004 | 0.0001 | 0.0000 | 0.0001 | 0.8187 | 0.0089 | 0.0022 |
| 6.   | H  | 0.0003 | 0.0001 | 0.0002 | 0.0000 | 0.0000 | 0.0000 | 0.0047 | 0.0003 | 0.0009 |
| 7.   | H  | 0.0006 | 0.0000 | 0.0001 | 0.0000 | 0.0001 | 0.0001 | 0.0107 | 0.0016 | 0.0026 |
| 8.   | H  | 0.0002 | 0.0003 | 0.0001 | 0.0000 | 0.0000 | 0.0000 | 0.0061 | 0.0006 | 0.0006 |
| 9.   | C  | 0.0001 | 0.0001 | 0.0010 | 0.0019 | 0.0003 | 0.0003 | 0.0105 | 0.8054 | 0.0053 |
| 10.  | H  | 0.0000 | 0.0000 | 0.0012 | 0.0006 | 0.0000 | 0.0001 | 0.0006 | 0.0179 | 0.0013 |
| 11.  | H  | 0.0000 | 0.0000 | 0.0006 | 0.0001 | 0.0000 | 0.0002 | 0.0004 | 0.0059 | 0.0007 |
| 12.  | H  | 0.0000 | 0.0000 | 0.0003 | 0.0002 | 0.0000 | 0.0000 | 0.0020 | 0.0096 | 0.0013 |
| 13.  | C  | 0.0000 | 0.0003 | 0.0007 | 0.0002 | 0.0001 | 0.0005 | 0.0053 | 0.8054 | 0.0105 |
| 14.  | H  | 0.0000 | 0.0000 | 0.0001 | 0.0000 | 0.0000 | 0.0000 | 0.0013 | 0.0178 | 0.0006 |
| 15.  | H  | 0.0000 | 0.0000 | 0.0001 | 0.0001 | 0.0000 | 0.0000 | 0.0007 | 0.0059 | 0.0004 |
| 16.  | H  | 0.0000 | 0.0000 | 0.0001 | 0.0000 | 0.0001 | 0.0000 | 0.0013 | 0.0096 | 0.0020 |
| 17.  | C  | 0.8887 | 0.8954 | 0.0065 | 0.0095 | 0.0011 | 0.0011 | 0.0022 | 0.0089 | 0.8187 |
| 18.  | H  | 0.0010 | 0.0007 | 0.0014 | 0.0002 | 0.0002 | 0.0004 | 0.0026 | 0.0016 | 0.0107 |
| 19.  | H  | 0.0000 | 0.0006 | 0.0070 | 0.0005 | 0.0003 | 0.0001 | 0.0006 | 0.0006 | 0.0061 |
| 20.  | H  | 0.0006 | 0.0000 | 0.0032 | 0.0004 | 0.0001 | 0.0002 | 0.0009 | 0.0003 | 0.0047 |
| 21.  | C  | 0.0070 | 0.0032 | 0.0000 | 0.8923 | 0.8874 | 0.8840 | 0.0087 | 0.0059 | 0.8173 |
| 22.  | H  | 0.0005 | 0.0004 | 0.8923 | 0.0000 | 0.0008 | 0.0008 | 0.0003 | 0.0022 | 0.0046 |
| 23.  | H  | 0.0003 | 0.0001 | 0.8874 | 0.0008 | 0.0000 | 0.0008 | 0.0025 | 0.0010 | 0.0077 |
| 24.  | H  | 0.0001 | 0.0002 | 0.8840 | 0.0008 | 0.0008 | 0.0000 | 0.0028 | 0.0007 | 0.0092 |
| 25.  | B  | 0.0006 | 0.0009 | 0.0087 | 0.0003 | 0.0025 | 0.0028 | 0.0000 | 0.0476 | 0.0851 |
| 26.  | B  | 0.0006 | 0.0003 | 0.0059 | 0.0022 | 0.0010 | 0.0007 | 0.0476 | 0.0000 | 0.0476 |
| 27.  | B  | 0.0061 | 0.0047 | 0.8173 | 0.0046 | 0.0077 | 0.0092 | 0.0851 | 0.0476 | 0.0000 |
| 28.  | C  | 0.0025 | 0.0098 | 0.0051 | 0.0016 | 0.0104 | 0.0103 | 1.0634 | 0.9201 | 1.0634 |

| Atom | 28 |        |
|------|----|--------|
| 1.   | C  | 0.0051 |
| 2.   | H  | 0.0104 |
| 3.   | H  | 0.0103 |
| 4.   | H  | 0.0016 |
| 5.   | C  | 0.0055 |



|     |   |        |
|-----|---|--------|
| 6.  | H | 0.0098 |
| 7.  | H | 0.0072 |
| 8.  | H | 0.0025 |
| 9.  | C | 0.0081 |
| 10. | H | 0.0054 |
| 11. | H | 0.0024 |
| 12. | H | 0.0099 |
| 13. | C | 0.0081 |
| 14. | H | 0.0054 |
| 15. | H | 0.0024 |
| 16. | H | 0.0099 |
| 17. | C | 0.0055 |
| 18. | H | 0.0072 |
| 19. | H | 0.0025 |
| 20. | H | 0.0098 |
| 21. | C | 0.0051 |
| 22. | H | 0.0016 |
| 23. | H | 0.0104 |
| 24. | H | 0.0103 |
| 25. | B | 1.0634 |
| 26. | B | 0.9201 |
| 27. | B | 1.0634 |
| 28. | C | 0.0000 |

#### ESP atomic charges

|    |   |           |
|----|---|-----------|
| 1  | C | -0.354016 |
| 2  | H | 0.013979  |
| 3  | H | -0.003269 |
| 4  | H | 0.024118  |
| 5  | C | -0.302438 |
| 6  | H | -0.011186 |
| 7  | H | 0.007043  |
| 8  | H | 0.013302  |
| 9  | C | -0.448461 |
| 10 | H | 0.007020  |
| 11 | H | 0.033677  |
| 12 | H | 0.042210  |
| 13 | C | -0.448553 |
| 14 | H | 0.007102  |
| 15 | H | 0.033627  |
| 16 | H | 0.042261  |
| 17 | C | -0.303723 |
| 18 | H | 0.007248  |
| 19 | H | 0.013494  |
| 20 | H | -0.010598 |
| 21 | C | -0.354803 |
| 22 | H | 0.024307  |
| 23 | H | 0.014190  |
| 24 | H | -0.003254 |
| 25 | B | 0.663492  |
| 26 | B | 0.944876  |
| 27 | B | 0.664111  |
| 28 | C | -1.315758 |

## Conformer 5B

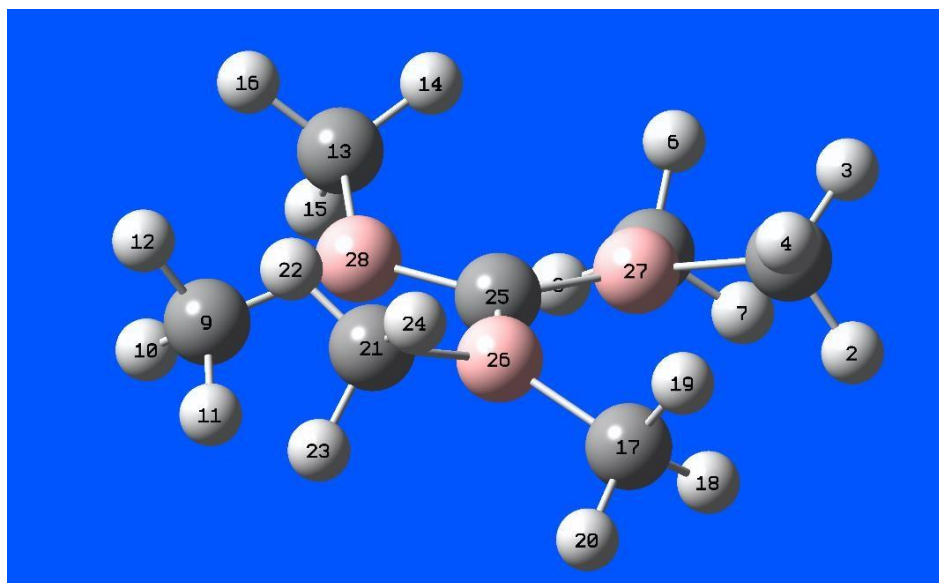

Standard orientation:

| Center Number | Atomic Number | Atomic Type | Coordinates (Angstroms) |           |           |
|---------------|---------------|-------------|-------------------------|-----------|-----------|
|               |               |             | X                       | Y         | Z         |
| 1             | 6             | 0           | -2.737615               | 0.366570  | 0.456289  |
| 2             | 1             | 0           | -3.347736               | 0.651378  | -0.425045 |
| 3             | 1             | 0           | -3.403584               | -0.259085 | 1.084605  |
| 4             | 1             | 0           | -2.508297               | 1.288225  | 1.013125  |
| 5             | 6             | 0           | -1.914015               | -1.991273 | -0.456409 |
| 6             | 1             | 0           | -2.214478               | -2.593962 | 0.424841  |
| 7             | 1             | 0           | -2.824492               | -1.916240 | -1.085016 |
| 8             | 1             | 0           | -1.160613               | -2.569789 | -1.013009 |
| 9             | 6             | 0           | 2.681528                | -0.662005 | -0.456254 |
| 10            | 1             | 0           | 3.072064                | -1.488193 | -1.084450 |
| 11            | 1             | 0           | 2.805839                | 0.279538  | -1.013158 |
| 12            | 1             | 0           | 3.353482                | -0.620413 | 0.425145  |
| 13            | 6             | 0           | 1.051268                | -2.554110 | 0.456395  |
| 14            | 1             | 0           | 0.138187                | -2.816431 | 1.012780  |
| 15            | 1             | 0           | 1.110336                | -3.225020 | -0.424800 |
| 16            | 1             | 0           | 1.925788                | -2.817747 | 1.085250  |
| 17            | 6             | 0           | -0.767549               | 2.653283  | -0.456079 |
| 18            | 1             | 0           | -1.645293               | 2.290151  | -1.012671 |
| 19            | 1             | 0           | -1.139216               | 3.214661  | 0.425303  |
| 20            | 1             | 0           | -0.247410               | 3.404399  | -1.084589 |
| 21            | 6             | 0           | 1.686372                | 2.187513  | 0.456084  |
| 22            | 1             | 0           | 2.369937                | 1.528101  | 1.012874  |
| 23            | 1             | 0           | 2.237969                | 2.573328  | -0.425395 |
| 24            | 1             | 0           | 1.477710                | 3.077184  | 1.084321  |
| 25            | 6             | 0           | -0.000004               | 0.000012  | -0.000036 |
| 26            | 5             | 0           | 0.286429                | 1.509032  | 0.000020  |
| 27            | 5             | 0           | -1.450059               | -0.506459 | -0.000023 |
| 28            | 5             | 0           | 1.163611                | -1.002576 | -0.000009 |

## ESP atomic charges

|   |   |           |
|---|---|-----------|
| 1 | C | -0.439335 |
| 2 | H | 0.059849  |
| 3 | H | 0.007692  |
| 4 | H | 0.028212  |

|    |   |           |
|----|---|-----------|
| 5  | C | -0.400396 |
| 6  | H | 0.051404  |
| 7  | H | -0.000399 |
| 8  | H | 0.015253  |
| 9  | C | -0.431509 |
| 10 | H | 0.007973  |
| 11 | H | 0.022445  |
| 12 | H | 0.058422  |
| 13 | C | -0.441988 |
| 14 | H | 0.028114  |
| 15 | H | 0.060552  |
| 16 | H | 0.008242  |
| 17 | C | -0.419702 |
| 18 | H | 0.021620  |
| 19 | H | 0.054970  |
| 20 | H | 0.003114  |
| 21 | C | -0.441708 |
| 22 | H | 0.027448  |
| 23 | H | 0.061216  |
| 24 | H | 0.009138  |
| 25 | C | -1.347681 |
| 26 | B | 0.801074  |
| 27 | B | 0.791916  |
| 28 | B | 0.804063  |

Wiberg bond index matrix in the NAO basis:

| Atom | 1 | 2      | 3      | 4      | 5      | 6      | 7      | 8      | 9      |        |
|------|---|--------|--------|--------|--------|--------|--------|--------|--------|--------|
| 1.   | C | 0.0000 | 0.9457 | 0.9428 | 0.9473 | 0.0070 | 0.0030 | 0.0012 | 0.0064 | 0.0007 |
| 2.   | H | 0.9457 | 0.0000 | 0.0008 | 0.0008 | 0.0011 | 0.0001 | 0.0001 | 0.0003 | 0.0001 |
| 3.   | H | 0.9428 | 0.0008 | 0.0000 | 0.0008 | 0.0010 | 0.0001 | 0.0004 | 0.0001 | 0.0004 |
| 4.   | H | 0.9473 | 0.0008 | 0.0008 | 0.0000 | 0.0086 | 0.0004 | 0.0002 | 0.0004 | 0.0002 |
| 5.   | C | 0.0070 | 0.0011 | 0.0010 | 0.0086 | 0.0000 | 0.9528 | 0.9409 | 0.9447 | 0.0002 |
| 6.   | H | 0.0030 | 0.0001 | 0.0001 | 0.0004 | 0.9528 | 0.0000 | 0.0006 | 0.0006 | 0.0002 |
| 7.   | H | 0.0012 | 0.0001 | 0.0004 | 0.0002 | 0.9409 | 0.0006 | 0.0000 | 0.0009 | 0.0001 |
| 8.   | H | 0.0064 | 0.0003 | 0.0001 | 0.0004 | 0.9447 | 0.0006 | 0.0009 | 0.0000 | 0.0000 |
| 9.   | C | 0.0007 | 0.0001 | 0.0004 | 0.0002 | 0.0002 | 0.0002 | 0.0001 | 0.0000 | 0.0000 |
| 10.  | H | 0.0001 | 0.0000 | 0.0000 | 0.0000 | 0.0002 | 0.0000 | 0.0000 | 0.0000 | 0.9333 |
| 11.  | H | 0.0001 | 0.0000 | 0.0000 | 0.0001 | 0.0001 | 0.0000 | 0.0000 | 0.0000 | 0.9431 |
| 12.  | H | 0.0001 | 0.0000 | 0.0000 | 0.0000 | 0.0001 | 0.0000 | 0.0001 | 0.0000 | 0.9449 |
| 13.  | C | 0.0010 | 0.0002 | 0.0003 | 0.0020 | 0.0004 | 0.0000 | 0.0001 | 0.0000 | 0.0082 |
| 14.  | H | 0.0010 | 0.0000 | 0.0001 | 0.0007 | 0.0001 | 0.0000 | 0.0000 | 0.0000 | 0.0010 |
| 15.  | H | 0.0007 | 0.0000 | 0.0002 | 0.0001 | 0.0001 | 0.0000 | 0.0000 | 0.0000 | 0.0092 |
| 16.  | H | 0.0003 | 0.0000 | 0.0000 | 0.0001 | 0.0002 | 0.0000 | 0.0001 | 0.0000 | 0.0009 |
| 17.  | C | 0.0004 | 0.0000 | 0.0000 | 0.0000 | 0.0021 | 0.0006 | 0.0002 | 0.0016 | 0.0004 |
| 18.  | H | 0.0001 | 0.0001 | 0.0001 | 0.0000 | 0.0002 | 0.0000 | 0.0001 | 0.0004 | 0.0001 |
| 19.  | H | 0.0002 | 0.0000 | 0.0000 | 0.0000 | 0.0016 | 0.0003 | 0.0004 | 0.0003 | 0.0000 |
| 20.  | H | 0.0002 | 0.0000 | 0.0000 | 0.0000 | 0.0006 | 0.0001 | 0.0000 | 0.0003 | 0.0000 |
| 21.  | C | 0.0003 | 0.0001 | 0.0001 | 0.0001 | 0.0004 | 0.0002 | 0.0001 | 0.0002 | 0.0010 |
| 22.  | H | 0.0001 | 0.0000 | 0.0000 | 0.0000 | 0.0000 | 0.0000 | 0.0000 | 0.0000 | 0.0020 |
| 23.  | H | 0.0001 | 0.0001 | 0.0000 | 0.0000 | 0.0000 | 0.0000 | 0.0001 | 0.0000 | 0.0002 |
| 24.  | H | 0.0001 | 0.0000 | 0.0001 | 0.0000 | 0.0000 | 0.0000 | 0.0001 | 0.0000 | 0.0003 |
| 25.  | B | 0.8470 | 0.0079 | 0.0094 | 0.0047 | 0.8499 | 0.0048 | 0.0109 | 0.0063 | 0.0096 |
| 26.  | B | 0.0064 | 0.0008 | 0.0006 | 0.0023 | 0.0080 | 0.0002 | 0.0013 | 0.0004 | 0.8297 |
| 27.  | B | 0.0082 | 0.0019 | 0.0022 | 0.0003 | 0.0022 | 0.0007 | 0.0020 | 0.0005 | 0.0052 |
| 28.  | C | 0.0051 | 0.0097 | 0.0093 | 0.0014 | 0.0054 | 0.0090 | 0.0066 | 0.0022 | 0.0084 |

  

| Atom | 10 | 11     | 12     | 13     | 14     | 15     | 16     | 17     | 18     |        |
|------|----|--------|--------|--------|--------|--------|--------|--------|--------|--------|
| 1.   | C  | 0.0001 | 0.0001 | 0.0001 | 0.0010 | 0.0010 | 0.0007 | 0.0003 | 0.0004 | 0.0001 |
| 2.   | H  | 0.0000 | 0.0000 | 0.0000 | 0.0002 | 0.0000 | 0.0000 | 0.0000 | 0.0000 | 0.0001 |
| 3.   | H  | 0.0000 | 0.0000 | 0.0000 | 0.0003 | 0.0001 | 0.0002 | 0.0000 | 0.0000 | 0.0001 |
| 4.   | H  | 0.0000 | 0.0001 | 0.0000 | 0.0020 | 0.0007 | 0.0001 | 0.0001 | 0.0000 | 0.0000 |
| 5.   | C  | 0.0002 | 0.0001 | 0.0001 | 0.0004 | 0.0001 | 0.0001 | 0.0002 | 0.0021 | 0.0002 |
| 6.   | H  | 0.0000 | 0.0000 | 0.0000 | 0.0000 | 0.0000 | 0.0000 | 0.0000 | 0.0006 | 0.0000 |
| 7.   | H  | 0.0000 | 0.0000 | 0.0001 | 0.0001 | 0.0000 | 0.0000 | 0.0001 | 0.0002 | 0.0001 |

## S28

|     |   |        |        |        |        |        |        |        |        |        |
|-----|---|--------|--------|--------|--------|--------|--------|--------|--------|--------|
| 8.  | H | 0.0000 | 0.0000 | 0.0000 | 0.0000 | 0.0000 | 0.0000 | 0.0000 | 0.0016 | 0.0004 |
| 9.  | C | 0.9333 | 0.9431 | 0.9449 | 0.0082 | 0.0010 | 0.0092 | 0.0009 | 0.0004 | 0.0001 |
| 10. | H | 0.0000 | 0.0007 | 0.0009 | 0.0010 | 0.0006 | 0.0001 | 0.0001 | 0.0001 | 0.0000 |
| 11. | H | 0.0007 | 0.0000 | 0.0008 | 0.0092 | 0.0001 | 0.0005 | 0.0002 | 0.0001 | 0.0000 |
| 12. | H | 0.0009 | 0.0008 | 0.0000 | 0.0009 | 0.0001 | 0.0002 | 0.0001 | 0.0002 | 0.0001 |
| 13. | C | 0.0010 | 0.0092 | 0.0009 | 0.0000 | 0.9333 | 0.9431 | 0.9449 | 0.0002 | 0.0001 |
| 14. | H | 0.0006 | 0.0001 | 0.0001 | 0.9333 | 0.0000 | 0.0007 | 0.0009 | 0.0002 | 0.0000 |
| 15. | H | 0.0001 | 0.0005 | 0.0002 | 0.9431 | 0.0007 | 0.0000 | 0.0008 | 0.0001 | 0.0000 |
| 16. | H | 0.0001 | 0.0002 | 0.0001 | 0.9449 | 0.0009 | 0.0008 | 0.0000 | 0.0001 | 0.0001 |
| 17. | C | 0.0001 | 0.0001 | 0.0002 | 0.0002 | 0.0002 | 0.0001 | 0.0001 | 0.0000 | 0.9409 |
| 18. | H | 0.0000 | 0.0000 | 0.0001 | 0.0001 | 0.0000 | 0.0000 | 0.0001 | 0.9409 | 0.0000 |
| 19. | H | 0.0000 | 0.0000 | 0.0000 | 0.0000 | 0.0000 | 0.0000 | 0.0000 | 0.9447 | 0.0009 |
| 20. | H | 0.0000 | 0.0000 | 0.0000 | 0.0002 | 0.0000 | 0.0000 | 0.0000 | 0.9528 | 0.0006 |
| 21. | C | 0.0010 | 0.0007 | 0.0003 | 0.0007 | 0.0001 | 0.0001 | 0.0001 | 0.0070 | 0.0012 |
| 22. | H | 0.0007 | 0.0001 | 0.0001 | 0.0002 | 0.0000 | 0.0001 | 0.0000 | 0.0086 | 0.0002 |
| 23. | H | 0.0000 | 0.0000 | 0.0000 | 0.0001 | 0.0000 | 0.0000 | 0.0000 | 0.0011 | 0.0001 |
| 24. | H | 0.0001 | 0.0002 | 0.0000 | 0.0004 | 0.0000 | 0.0000 | 0.0000 | 0.0010 | 0.0004 |
| 25. | B | 0.0005 | 0.0003 | 0.0016 | 0.0052 | 0.0010 | 0.0006 | 0.0010 | 0.0022 | 0.0020 |
| 26. | B | 0.0177 | 0.0061 | 0.0096 | 0.8297 | 0.0177 | 0.0061 | 0.0096 | 0.0080 | 0.0013 |
| 27. | B | 0.0010 | 0.0006 | 0.0010 | 0.0096 | 0.0005 | 0.0003 | 0.0016 | 0.8499 | 0.0109 |
| 28. | C | 0.0048 | 0.0019 | 0.0091 | 0.0084 | 0.0048 | 0.0019 | 0.0091 | 0.0054 | 0.0066 |

|     | Atom | 19     | 20     | 21     | 22     | 23     | 24     | 25     | 26     | 27     |
|-----|------|--------|--------|--------|--------|--------|--------|--------|--------|--------|
| 1.  | C    | 0.0002 | 0.0002 | 0.0003 | 0.0001 | 0.0001 | 0.0001 | 0.8470 | 0.0064 | 0.0082 |
| 2.  | H    | 0.0000 | 0.0000 | 0.0001 | 0.0000 | 0.0001 | 0.0000 | 0.0079 | 0.0008 | 0.0019 |
| 3.  | H    | 0.0000 | 0.0000 | 0.0001 | 0.0000 | 0.0000 | 0.0001 | 0.0094 | 0.0006 | 0.0022 |
| 4.  | H    | 0.0000 | 0.0000 | 0.0001 | 0.0000 | 0.0000 | 0.0000 | 0.0047 | 0.0023 | 0.0003 |
| 5.  | C    | 0.0016 | 0.0006 | 0.0004 | 0.0000 | 0.0000 | 0.0000 | 0.8499 | 0.0080 | 0.0022 |
| 6.  | H    | 0.0003 | 0.0001 | 0.0002 | 0.0000 | 0.0000 | 0.0000 | 0.0048 | 0.0002 | 0.0007 |
| 7.  | H    | 0.0004 | 0.0000 | 0.0001 | 0.0000 | 0.0001 | 0.0001 | 0.0109 | 0.0013 | 0.0020 |
| 8.  | H    | 0.0003 | 0.0003 | 0.0002 | 0.0000 | 0.0000 | 0.0000 | 0.0063 | 0.0004 | 0.0005 |
| 9.  | C    | 0.0000 | 0.0000 | 0.0010 | 0.0020 | 0.0002 | 0.0003 | 0.0096 | 0.8297 | 0.0052 |
| 10. | H    | 0.0000 | 0.0000 | 0.0010 | 0.0007 | 0.0000 | 0.0001 | 0.0005 | 0.0177 | 0.0010 |
| 11. | H    | 0.0000 | 0.0000 | 0.0007 | 0.0001 | 0.0000 | 0.0002 | 0.0003 | 0.0061 | 0.0006 |
| 12. | H    | 0.0000 | 0.0000 | 0.0003 | 0.0001 | 0.0000 | 0.0000 | 0.0016 | 0.0096 | 0.0010 |
| 13. | C    | 0.0000 | 0.0002 | 0.0007 | 0.0002 | 0.0001 | 0.0004 | 0.0052 | 0.8297 | 0.0096 |
| 14. | H    | 0.0000 | 0.0000 | 0.0001 | 0.0000 | 0.0000 | 0.0000 | 0.0010 | 0.0177 | 0.0005 |
| 15. | H    | 0.0000 | 0.0000 | 0.0001 | 0.0001 | 0.0000 | 0.0000 | 0.0006 | 0.0061 | 0.0003 |
| 16. | H    | 0.0000 | 0.0000 | 0.0001 | 0.0000 | 0.0000 | 0.0000 | 0.0010 | 0.0096 | 0.0016 |
| 17. | C    | 0.9447 | 0.9528 | 0.0070 | 0.0086 | 0.0011 | 0.0010 | 0.0022 | 0.0080 | 0.8499 |
| 18. | H    | 0.0009 | 0.0006 | 0.0012 | 0.0002 | 0.0001 | 0.0004 | 0.0020 | 0.0013 | 0.0109 |
| 19. | H    | 0.0000 | 0.0006 | 0.0064 | 0.0004 | 0.0003 | 0.0001 | 0.0005 | 0.0004 | 0.0063 |
| 20. | H    | 0.0006 | 0.0000 | 0.0030 | 0.0004 | 0.0001 | 0.0001 | 0.0007 | 0.0002 | 0.0048 |
| 21. | C    | 0.0064 | 0.0030 | 0.0000 | 0.9473 | 0.9457 | 0.9428 | 0.0082 | 0.0064 | 0.8470 |
| 22. | H    | 0.0004 | 0.0004 | 0.9473 | 0.0000 | 0.0008 | 0.0008 | 0.0003 | 0.0023 | 0.0047 |
| 23. | H    | 0.0003 | 0.0001 | 0.9457 | 0.0008 | 0.0000 | 0.0008 | 0.0019 | 0.0008 | 0.0079 |
| 24. | H    | 0.0001 | 0.0001 | 0.9428 | 0.0008 | 0.0008 | 0.0000 | 0.0022 | 0.0006 | 0.0094 |
| 25. | B    | 0.0005 | 0.0007 | 0.0082 | 0.0003 | 0.0019 | 0.0022 | 0.0000 | 0.0442 | 0.0819 |
| 26. | B    | 0.0004 | 0.0002 | 0.0064 | 0.0023 | 0.0008 | 0.0006 | 0.0442 | 0.0000 | 0.0442 |
| 27. | B    | 0.0063 | 0.0048 | 0.8470 | 0.0047 | 0.0079 | 0.0094 | 0.0819 | 0.0442 | 0.0000 |
| 28. | C    | 0.0022 | 0.0090 | 0.0051 | 0.0014 | 0.0097 | 0.0093 | 1.1299 | 0.9577 | 1.1299 |

|     | Atom | 28     |
|-----|------|--------|
| 1.  | C    | 0.0051 |
| 2.  | H    | 0.0097 |
| 3.  | H    | 0.0093 |
| 4.  | H    | 0.0014 |
| 5.  | C    | 0.0054 |
| 6.  | H    | 0.0090 |
| 7.  | H    | 0.0066 |
| 8.  | H    | 0.0022 |
| 9.  | C    | 0.0084 |
| 10. | H    | 0.0048 |
| 11. | H    | 0.0019 |
| 12. | H    | 0.0091 |
| 13. | C    | 0.0084 |

|     |   |        |
|-----|---|--------|
| 14. | H | 0.0048 |
| 15. | H | 0.0019 |
| 16. | H | 0.0091 |
| 17. | C | 0.0054 |
| 18. | H | 0.0066 |
| 19. | H | 0.0022 |
| 20. | H | 0.0090 |
| 21. | C | 0.0051 |
| 22. | H | 0.0014 |
| 23. | H | 0.0097 |
| 24. | H | 0.0093 |
| 25. | B | 1.1299 |
| 26. | B | 0.9577 |
| 27. | B | 1.1299 |
| 28. | C | 0.0000 |

## 11. Anion 6 (conformers 6A and 6B)

Geometry optimized at the B2PLYP/QZVP level

### Conformer 6A

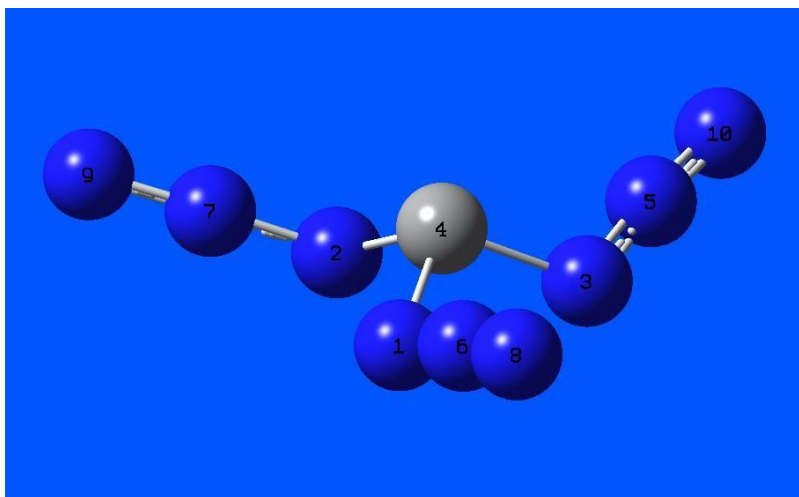

Symmetry point group:  $C_3$

Standard orientation:

| Center Number | Atomic Number | Atomic Type | Coordinates (Angstroms) |           |           |
|---------------|---------------|-------------|-------------------------|-----------|-----------|
|               |               |             | X                       | Y         | Z         |
| 1             | 7             | 0           | 0.203923                | -1.344331 | -0.386622 |
| 2             | 7             | 0           | -1.266281               | 0.495383  | -0.386714 |
| 3             | 7             | 0           | 1.062042                | 0.848781  | -0.386629 |
| 4             | 6             | 0           | -0.000082               | -0.000061 | 0.238392  |
| 5             | 7             | 0           | 1.171416                | 1.992917  | 0.003346  |
| 6             | 7             | 0           | 1.140355                | -2.010981 | 0.003076  |
| 7             | 7             | 0           | -2.311799               | 0.017990  | 0.003195  |
| 8             | 7             | 0           | 1.993320                | -2.717614 | 0.315394  |
| 9             | 7             | 0           | -3.350373               | -0.367023 | 0.315427  |
| 10            | 7             | 0           | 1.357467                | 3.084930  | 0.315192  |

### ENERGY (a.u.):

E = -530.5891487

### ESP atomic charges

|   |   |           |
|---|---|-----------|
| 1 | N | -0.267040 |
| 2 | N | -0.273830 |
| 3 | N | -0.269719 |
| 4 | C | -0.416494 |
| 5 | N | 0.589630  |
| 6 | N | 0.583473  |
| 7 | N | 0.593259  |

```

8 N -0.510669
9 N -0.514879
10 N -0.513731

```

Wiberg bond index matrix in the NAO basis:

| Atom |   | 1      | 2      | 3      | 4      | 5      | 6      | 7      | 8      | 9      |
|------|---|--------|--------|--------|--------|--------|--------|--------|--------|--------|
| 1.   | N | 0.0000 | 0.0211 | 0.0211 | 0.8718 | 0.0088 | 1.5171 | 0.0061 | 0.5604 | 0.0114 |
| 2.   | N | 0.0211 | 0.0000 | 0.0211 | 0.8718 | 0.0061 | 0.0088 | 1.5172 | 0.0028 | 0.5604 |
| 3.   | N | 0.0211 | 0.0211 | 0.0000 | 0.8718 | 1.5171 | 0.0061 | 0.0088 | 0.0114 | 0.0028 |
| 4.   | C | 0.8718 | 0.8718 | 0.8718 | 0.0000 | 0.0368 | 0.0368 | 0.0368 | 0.0676 | 0.0675 |
| 5.   | N | 0.0088 | 0.0061 | 1.5171 | 0.0368 | 0.0000 | 0.0014 | 0.0014 | 0.0033 | 0.0020 |
| 6.   | N | 1.5171 | 0.0088 | 0.0061 | 0.0368 | 0.0014 | 0.0000 | 0.0014 | 2.1209 | 0.0033 |
| 7.   | N | 0.0061 | 1.5172 | 0.0088 | 0.0368 | 0.0014 | 0.0014 | 0.0000 | 0.0020 | 2.1209 |
| 8.   | N | 0.5604 | 0.0028 | 0.0114 | 0.0676 | 0.0033 | 2.1209 | 0.0020 | 0.0000 | 0.0040 |
| 9.   | N | 0.0114 | 0.5604 | 0.0028 | 0.0675 | 0.0020 | 0.0033 | 2.1209 | 0.0040 | 0.0000 |
| 10.  | N | 0.0028 | 0.0114 | 0.5605 | 0.0675 | 2.1209 | 0.0020 | 0.0033 | 0.0040 | 0.0040 |

| Atom |   | 10     |
|------|---|--------|
| 1.   | N | 0.0028 |
| 2.   | N | 0.0114 |
| 3.   | N | 0.5605 |
| 4.   | C | 0.0675 |
| 5.   | N | 2.1209 |
| 6.   | N | 0.0020 |
| 7.   | N | 0.0033 |
| 8.   | N | 0.0040 |
| 9.   | N | 0.0040 |
| 10.  | N | 0.0000 |

## Conformer 6B

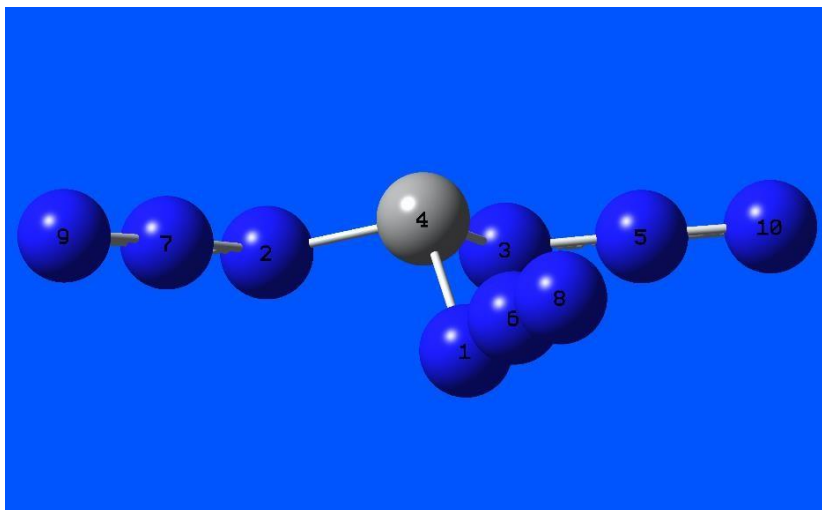

Symmetry point group:  $C_s$

Standard orientation:

| Center<br>Number | Atomic<br>Number | Atomic<br>Type | Coordinates (Angstroms) |   |   |
|------------------|------------------|----------------|-------------------------|---|---|
|                  |                  |                | X                       | Y | Z |
| -----            |                  |                |                         |   |   |
| -----            |                  |                |                         |   |   |

## S32

|    |   |   |           |           |           |
|----|---|---|-----------|-----------|-----------|
| 1  | 7 | 0 | 0.000104  | 0.790985  | 0.634525  |
| 2  | 7 | 0 | -1.137950 | -1.258690 | 0.132072  |
| 3  | 7 | 0 | 1.137390  | -1.259087 | 0.131980  |
| 4  | 6 | 0 | -0.000154 | -0.420343 | -0.321055 |
| 5  | 7 | 0 | 2.262215  | -0.845535 | -0.051235 |
| 6  | 7 | 0 | 0.000507  | 1.893446  | 0.122339  |
| 7  | 7 | 0 | -2.262652 | -0.844807 | -0.051156 |
| 8  | 7 | 0 | 0.000893  | 2.972678  | -0.271122 |
| 9  | 7 | 0 | -3.366119 | -0.543913 | -0.186157 |
| 10 | 7 | 0 | 3.365743  | -0.544784 | -0.186056 |

---

ENERGY (a.u.):

E =-530.5895105

## ESP atomic charges

|    |   |           |
|----|---|-----------|
| 1  | N | -0.280684 |
| 2  | N | -0.294287 |
| 3  | N | -0.294413 |
| 4  | C | -0.414870 |
| 5  | N | 0.617164  |
| 6  | N | 0.618799  |
| 7  | N | 0.617153  |
| 8  | N | -0.523002 |
| 9  | N | -0.522947 |
| 10 | N | -0.522913 |

## Wiberg bond index matrix in the NAO basis:

| Atom  | 1      | 2      | 3      | 4      | 5      | 6      | 7      | 8      | 9      |
|-------|--------|--------|--------|--------|--------|--------|--------|--------|--------|
| 1. N  | 0.0000 | 0.0203 | 0.0203 | 0.8181 | 0.0064 | 1.5236 | 0.0064 | 0.5626 | 0.0115 |
| 2. N  | 0.0203 | 0.0000 | 0.0246 | 0.8890 | 0.0086 | 0.0090 | 1.5198 | 0.0097 | 0.5615 |
| 3. N  | 0.0203 | 0.0246 | 0.0000 | 0.8890 | 1.5198 | 0.0090 | 0.0086 | 0.0097 | 0.0022 |
| 4. C  | 0.8181 | 0.8890 | 0.8890 | 0.0000 | 0.0392 | 0.0226 | 0.0392 | 0.0575 | 0.0710 |
| 5. N  | 0.0064 | 0.0086 | 1.5198 | 0.0392 | 0.0000 | 0.0010 | 0.0014 | 0.0029 | 0.0012 |
| 6. N  | 1.5236 | 0.0090 | 0.0090 | 0.0226 | 0.0010 | 0.0000 | 0.0010 | 2.1284 | 0.0033 |
| 7. N  | 0.0064 | 1.5198 | 0.0086 | 0.0392 | 0.0014 | 0.0010 | 0.0000 | 0.0029 | 2.1149 |
| 8. N  | 0.5626 | 0.0097 | 0.0097 | 0.0575 | 0.0029 | 2.1284 | 0.0029 | 0.0000 | 0.0070 |
| 9. N  | 0.0115 | 0.5615 | 0.0022 | 0.0710 | 0.0012 | 0.0033 | 2.1149 | 0.0070 | 0.0000 |
| 10. N | 0.0115 | 0.0022 | 0.5614 | 0.0710 | 2.1149 | 0.0033 | 0.0012 | 0.0070 | 0.0016 |

| Atom  | 10     |
|-------|--------|
| 1. N  | 0.0115 |
| 2. N  | 0.0022 |
| 3. N  | 0.5614 |
| 4. C  | 0.0710 |
| 5. N  | 2.1149 |
| 6. N  | 0.0033 |
| 7. N  | 0.0012 |
| 8. N  | 0.0070 |
| 9. N  | 0.0016 |
| 10. N | 0.0000 |



## 12. Decomposition of dinitramide anion 2 with extruding nitrate anion; gas phase

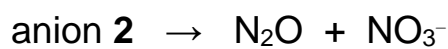

(Ref. 30a in the main text)

### Reaction energy profile (this work)

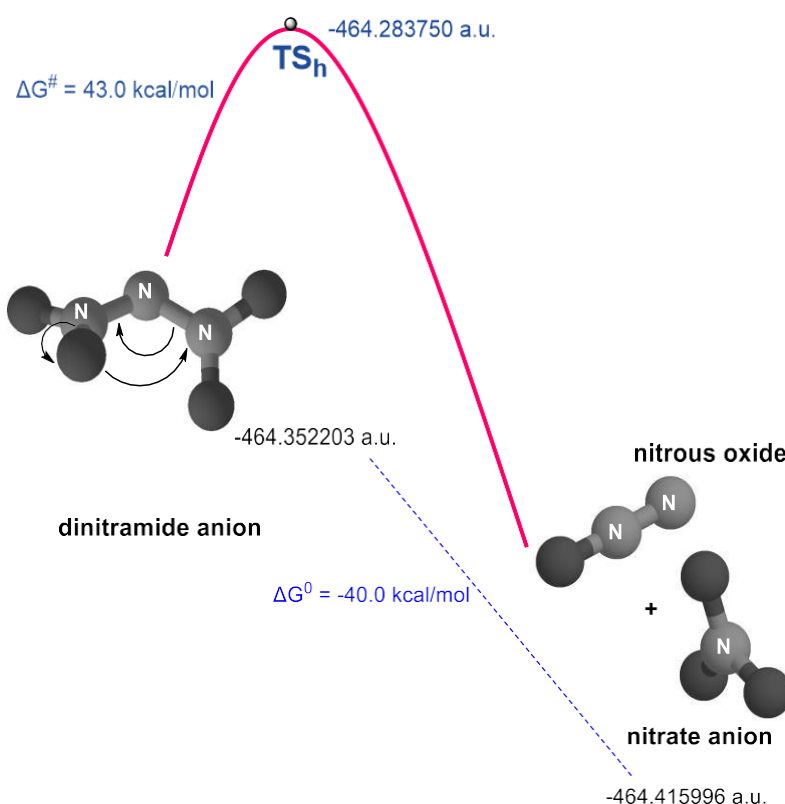

A similar scheme is given in Ref. 30a.

### Located transition state $\text{TS}_h$

Optimized at the MP2/aug-cc-pVTZ level without applying geometry constrains. The transition state of similar geometry for this reaction was also located in Ref. 30a with using other QM calculation methods.

Standard orientation:

| Center Number | Atomic Number | Atomic Type | Coordinates (Angstroms) |           |           |
|---------------|---------------|-------------|-------------------------|-----------|-----------|
|               |               |             | X                       | Y         | Z         |
| 1             | 7             | 0           | 1.040415                | -0.022152 | 0.000184  |
| 2             | 7             | 0           | -1.183121               | 0.177295  | -0.000540 |
| 3             | 8             | 0           | 1.557692                | 0.048252  | 1.094520  |
| 4             | 8             | 0           | 1.558991                | 0.044821  | -1.093879 |
| 5             | 8             | 0           | -2.349380               | -0.179632 | 0.000486  |

|   |   |   |           |           |           |
|---|---|---|-----------|-----------|-----------|
| 6 | 8 | 0 | -0.177546 | -1.101014 | 0.001141  |
| 7 | 7 | 0 | -0.531301 | 1.202083  | -0.002236 |

**ENERGY (a.u.):**

MP2=-464.2791025

|                                              |                             |
|----------------------------------------------|-----------------------------|
| Zero-point correction=                       | 0.025085 (Hartree/Particle) |
| Thermal correction to Energy=                | 0.030659                    |
| Thermal correction to Enthalpy=              | 0.031604                    |
| Thermal correction to Gibbs Free Energy=     | -0.004648                   |
| Sum of electronic and zero-point Energies=   | -464.254018                 |
| Sum of electronic and thermal Energies=      | -464.248443                 |
| Sum of electronic and thermal Enthalpies=    | -464.247499                 |
| Sum of electronic and thermal Free Energies= | -464.283750                 |

**FREQUENCIES**

|                |            |           |           |
|----------------|------------|-----------|-----------|
| Frequencies -- | -1110.9758 | 109.4785  | 291.2047  |
| Frequencies -- | 313.9511   | 379.4667  | 501.9597  |
| Frequencies -- | 536.7568   | 633.9017  | 708.2200  |
| Frequencies -- | 779.6508   | 812.2218  | 1236.3553 |
| Frequencies -- | 1307.5553  | 1681.1908 | 1718.9218 |

**Wiberg bond index** matrix in the NAO basis:

| Atom | 1      | 2      | 3      | 4      | 5      | 6      | 7      |
|------|--------|--------|--------|--------|--------|--------|--------|
| 1. N | 0.0000 | 0.0179 | 1.4208 | 1.4206 | 0.0240 | 0.5598 | 0.2560 |
| 2. N | 0.0179 | 0.0000 | 0.0202 | 0.0202 | 1.3613 | 0.5296 | 1.7051 |
| 3. O | 1.4208 | 0.0202 | 0.0000 | 0.2733 | 0.0142 | 0.1348 | 0.0919 |
| 4. O | 1.4206 | 0.0202 | 0.2733 | 0.0000 | 0.0142 | 0.1348 | 0.0919 |
| 5. O | 0.0240 | 1.3613 | 0.0142 | 0.0142 | 0.0000 | 0.1130 | 0.3513 |
| 6. O | 0.5598 | 0.5296 | 0.1348 | 0.1348 | 0.1130 | 0.0000 | 0.2303 |
| 7. N | 0.2560 | 1.7051 | 0.0919 | 0.0919 | 0.3513 | 0.2303 | 0.0000 |

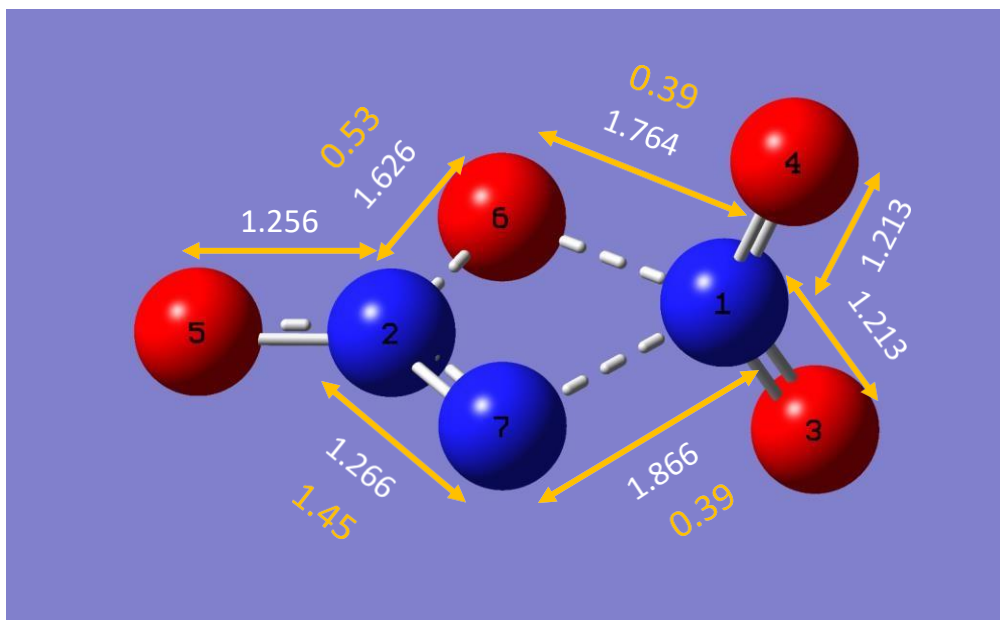

Modeled geometry of transition state  $TS_h$  of the above mentioned electrocyclic reaction. Numbers in white and yellow show interatomic distances and calculated bond orders (as Wiberg indexes), respectively.

### 13. Low barrier decomposition of dinitramide anion **2** yielding $\text{NO}_2$ and $\text{N}_2\text{O}_2^-$ ; gas phase

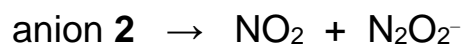

(Ref. 30a in the main text)

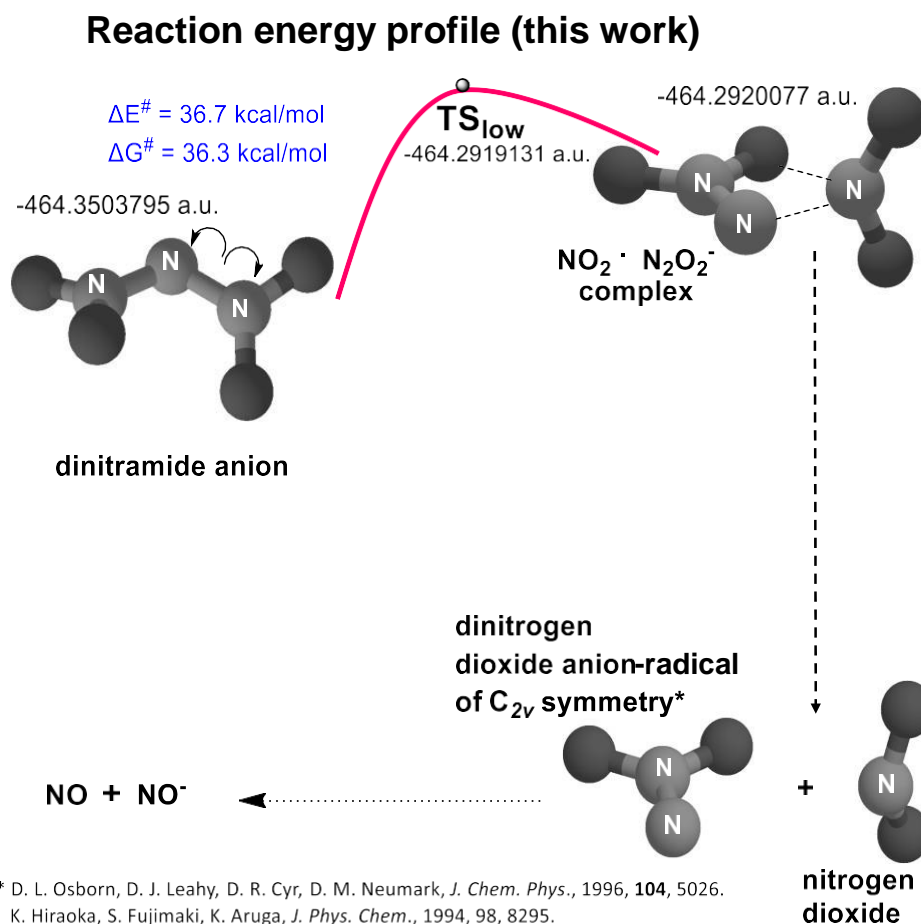

This scheme differs from that from Ref. 30a by supplying the transition state  $\text{TS}_{\text{low}}$  as well as the related supramolecular product  $\text{N}_2\text{O} \cdot \text{N}_2\text{O}_4^-$ . Dotted arrows show further transformations (not modeled in this study).

#### Located transition state $\text{TS}_{\text{low}}$

Optimized at the MP2/aug-cc-pVTZ level without applying geometry constrains

Standard orientation:

| Center Number | Atomic Number | Atomic Type | Coordinates (Angstroms) |           |           |
|---------------|---------------|-------------|-------------------------|-----------|-----------|
|               |               |             | X                       | Y         | Z         |
| 1             | 7             | 0           | 1.049795                | 0.000001  | 0.013746  |
| 2             | 7             | 0           | -1.111478               | -0.000002 | 0.092463  |
| 3             | 8             | 0           | 1.571896                | -1.094440 | -0.000359 |
| 4             | 8             | 0           | 1.571884                | 1.094447  | -0.000377 |

|   |   |   |           |           |           |
|---|---|---|-----------|-----------|-----------|
| 5 | 8 | 0 | -2.358823 | 0.000001  | -0.056536 |
| 6 | 8 | 0 | -0.358643 | -0.000013 | -1.047681 |
| 7 | 7 | 0 | -0.425533 | 0.000006  | 1.156595  |

**ENERGY (a.u):**

MP2=-464.2919131

|                                              |                             |
|----------------------------------------------|-----------------------------|
| Zero-point correction=                       | 0.026879 (Hartree/Particle) |
| Thermal correction to Energy=                | 0.031965                    |
| Thermal correction to Enthalpy=              | 0.032909                    |
| Thermal correction to Gibbs Free Energy=     | -0.002393                   |
| Sum of electronic and zero-point Energies=   | -464.265035                 |
| Sum of electronic and thermal Energies=      | -464.259949                 |
| Sum of electronic and thermal Enthalpies=    | -464.259004                 |
| Sum of electronic and thermal Free Energies= | -464.294306                 |

**FREQUENCIES**

|                |           |           |           |
|----------------|-----------|-----------|-----------|
| Frequencies -- | -319.4284 | 135.1018  | 299.4855  |
| Frequencies -- | 421.2430  | 490.0892  | 578.1320  |
| Frequencies -- | 634.9801  | 719.6690  | 774.5096  |
| Frequencies -- | 814.6672  | 1036.1578 | 1202.6873 |
| Frequencies -- | 1342.5246 | 1667.5673 | 1681.5214 |

Wiberg bond index matrix in the NAO basis:

| Atom | 1      | 2      | 3      | 4      | 5      | 6      | 7      |
|------|--------|--------|--------|--------|--------|--------|--------|
| 1. N | 0.0000 | 0.0164 | 1.4112 | 1.4112 | 0.0347 | 0.3932 | 0.3888 |
| 2. N | 0.0164 | 0.0000 | 0.0109 | 0.0109 | 1.2287 | 0.9134 | 1.4524 |
| 3. O | 1.4112 | 0.0109 | 0.0000 | 0.2416 | 0.0125 | 0.1288 | 0.1340 |
| 4. O | 1.4112 | 0.0109 | 0.2416 | 0.0000 | 0.0125 | 0.1288 | 0.1340 |
| 5. O | 0.0347 | 1.2287 | 0.0125 | 0.0125 | 0.0000 | 0.1146 | 0.2748 |
| 6. O | 0.3932 | 0.9134 | 0.1288 | 0.1288 | 0.1146 | 0.0000 | 0.2224 |
| 7. N | 0.3888 | 1.4524 | 0.1340 | 0.1340 | 0.2748 | 0.2224 | 0.0000 |

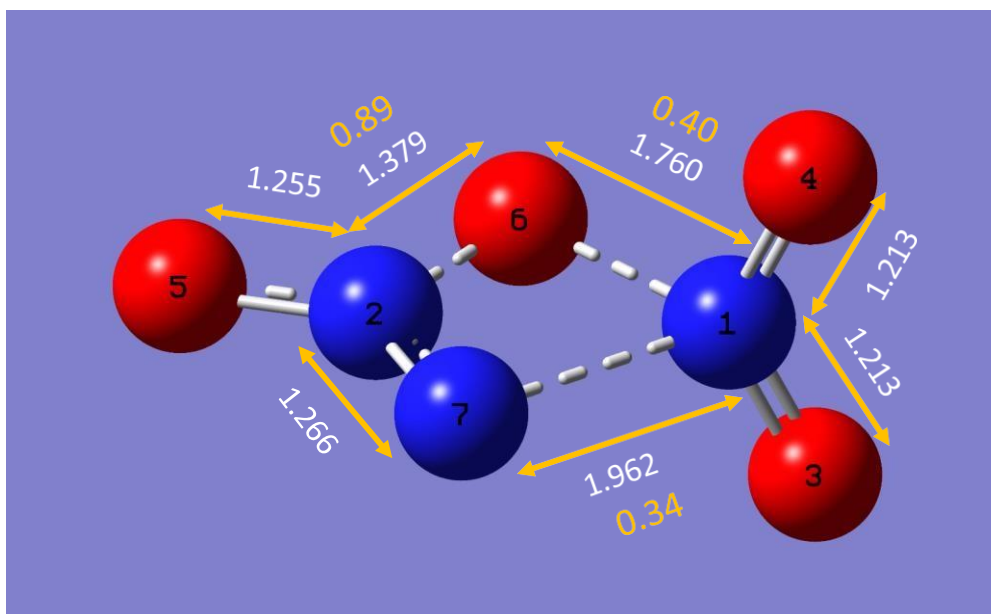

Modeled geometry of transition state  $TS_{low}$ . Numbers in white and yellow show interatomic distances and calculated bond orders (as Wiberg indexes), respectively.

## Located molecular complex $\text{NO}_2 \cdot \text{N}_2\text{O}_2^-$

Optimized at the MP2/aug-cc-pVTZ level without applying geometry constrains; gas phase

### ENERGY (a.u.):

MP2=-464.2920077

|                                              |                             |
|----------------------------------------------|-----------------------------|
| Zero-point correction=                       | 0.027811 (Hartree/Particle) |
| Thermal correction to Energy=                | 0.033414                    |
| Thermal correction to Enthalpy=              | 0.034358                    |
| Thermal correction to Gibbs Free Energy=     | -0.001907                   |
| Sum of electronic and zero-point Energies=   | -464.264196                 |
| Sum of electronic and thermal Energies=      | -464.258594                 |
| Sum of electronic and thermal Enthalpies=    | -464.257650                 |
| Sum of electronic and thermal Free Energies= | -464.293915                 |

### FREQUENCIES

|                |           |           |           |
|----------------|-----------|-----------|-----------|
| Frequencies -- | 127.5237  | 229.4753  | 286.4937  |
| Frequencies -- | 417.0530  | 472.6021  | 621.7733  |
| Frequencies -- | 647.4614  | 710.5426  | 804.7340  |
| Frequencies -- | 829.6252  | 1107.2098 | 1183.9340 |
| Frequencies -- | 1365.7881 | 1697.4090 | 1706.1872 |

Wiberg bond index matrix in the NAO basis:

| Atom | 1      | 2      | 3      | 4      | 5      | 6      | 7      |
|------|--------|--------|--------|--------|--------|--------|--------|
| 1. N | 0.0000 | 0.0162 | 1.4135 | 1.4135 | 0.0340 | 0.3988 | 0.3379 |
| 2. N | 0.0162 | 0.0000 | 0.0105 | 0.0105 | 1.2320 | 0.8900 | 1.4583 |
| 3. O | 1.4135 | 0.0105 | 0.0000 | 0.2463 | 0.0123 | 0.1265 | 0.1276 |
| 4. O | 1.4135 | 0.0105 | 0.2463 | 0.0000 | 0.0123 | 0.1265 | 0.1276 |
| 5. O | 0.0340 | 1.2320 | 0.0123 | 0.0123 | 0.0000 | 0.1118 | 0.2789 |
| 6. O | 0.3988 | 0.8900 | 0.1265 | 0.1265 | 0.1118 | 0.0000 | 0.2186 |
| 7. N | 0.3379 | 1.4583 | 0.1276 | 0.1276 | 0.2789 | 0.2186 | 0.0000 |

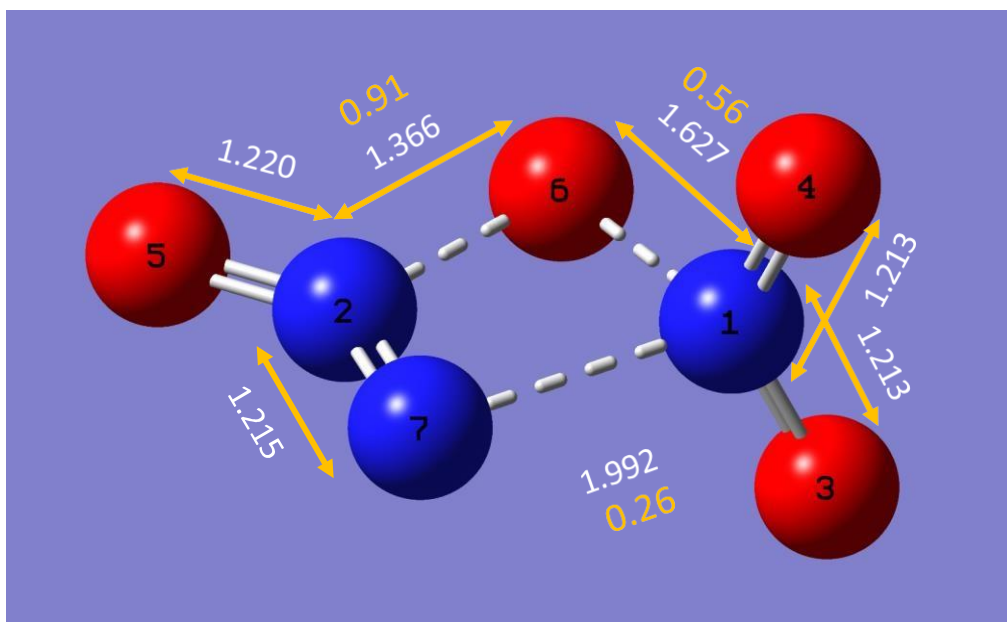

Numbers in white and yellow show interatomic distances and calculated bond orders (as Wiberg indexes), respectively.

$\sigma$  Bonding in the N–N unit in NBO representation(bold: occupancy; italics: atomic orbital coefficient; underlined: formal orbital number) $\sigma$  bonding orbital

```

4. (1.80032) BD (1) N 1 - N 7
      ( 47.00%)  0.6855* N 1 s( 12.40%)p 7.05( 87.43%)d 0.01(  0.13%)
              f 0.00(  0.04%)
      ( 53.00%)  0.7280* N 7 s(  2.94%)p32.93( 96.83%)d 0.08(  0.23%)
              f 0.00(  0.00%)

```

 $\sigma^*$  antibonding orbital

```

318. (0.68566) BD*(1) N 1 - N 7
      ( 53.00%)  0.7280* N 1 s( 12.40%)p 7.05( 87.43%)d 0.01(  0.13%)
              f 0.00(  0.04%)
      ( 47.00%) -0.6855* N 7 s(  2.94%)p32.93( 96.83%)d 0.08(  0.23%)
              f 0.00(  0.00%)

```
